# Supplementary material for: Costs of Tuberculosis at 3 Treatment Centers, Canada, 2010–2016
Source: PubMed Central journal article supplement (PMC9423918; doi:10.3201/eid2809.220092), 2022-09
Supplement: 22-0092-Techapp-s1.pdf [file 22-0092-Techapp-s1.pdf]

# Costs of Tuberculosis at 3 Treatment Centers, Canada, 2010–2016

## Appendix

### Methods

#### Additional Details on Cost Estimation for Contact Investigations

Contact investigation costs were estimated using a top-down approach based on data from Toronto Public Health in 2017. Costs for contact investigations were estimated solely on time spent (i.e., no costs of overhead or materials) by public health staff who managed the 206 pulmonary tuberculosis cases in Toronto, Ontario in 2017. From these 206 cases, 1689 contacts were identified (i.e., 8.2 contacts per case). From interviews performed by Elizabeth Rea (who works at Toronto Public Health and is an author on this manuscript), public health nurse tuberculosis case managers estimated that they spent 40% of their time on activities related to contact investigation (follow-ups, counselling, testing, sputum collection, chest x-rays, and diagnosis). The total combined annual salary (including benefits) for the 22 FTE public health nurse case managers was \$2,192,465, and thus, 40% of their time was valued at \$876,986. In addition, there are support staff that estimated they spent 25% of their time assisting with data management, logistics, and communication associated with contact investigations. The total combined annual salary (including benefits) of the 5 FTE support staff was \$390,104, and thus, 25% of their time was valued at \$97,526. Taken together, this results in estimated personnel cost associated with contact investigation of \$4,730 per index tuberculosis patient or a cost of \$577 per contact identified. In terms of time spent on contact investigation by public health staff, if one assumes 20 working days per month (or 240 working days per year) then the time associated with contact investigation per index tuberculosis patient was 11.7 days or 1.43 days per contact identified.

**Appendix Table 1.** Data Fields for Patient Information

| Variable                                                  | Value                                                                                                                                                               |
|-----------------------------------------------------------|---------------------------------------------------------------------------------------------------------------------------------------------------------------------|
| Site ID                                                   | numeric                                                                                                                                                             |
| Patient ID                                                | numeric                                                                                                                                                             |
| Patient Age (At Treatment Start)                          | numeric                                                                                                                                                             |
| Sex                                                       | Male, Female, Unknown                                                                                                                                               |
| Foreign-Born                                              | Yes, No                                                                                                                                                             |
| If Foreign-Born, What is the Country of Origin?           | character                                                                                                                                                           |
| If Foreign-Born, What is the Year of Arrival?             | numeric                                                                                                                                                             |
| If Foreign-Born, What is the Immigration Status?          | Citizen, Permanent Resident, Temporary Permit, Refugee, Undocumented, Other                                                                                         |
| Occupation                                                | Health care worker, Migrant or seasonal worker, Retired, Not seeking employment, Correctional facility employee, Military, Other, Unemployed, Undocumented, Student |
| If Employed, Had to Stop Working for Treatment            | Yes, No, Unknown                                                                                                                                                    |
| Weight (kg)                                               | numeric                                                                                                                                                             |
| BMI (in kg/m <sup>2</sup> )                               | numeric                                                                                                                                                             |
| HIV Test Placed                                           | Yes, No, Unknown                                                                                                                                                    |
| HIV Status                                                | Positive, Negative, Unknown, Not Done                                                                                                                               |
| On ART                                                    | Yes, No, Unknown                                                                                                                                                    |
| Previous Treatment?                                       | Yes, No, Unknown                                                                                                                                                    |
| Previous Treatment Type                                   | TB Infection, DS-TB, MDR-TB, Unknown                                                                                                                                |
| Most Recent Previous Treatment Date                       | (mm/dd/yyyy)                                                                                                                                                        |
| Previous Treatment Outcome                                | Cure, Complete, Failure, Relapse, Lost, Adverse Event, Unknown                                                                                                      |
| Previous Treatment with First-Line Drugs                  | Yes, No, Unknown                                                                                                                                                    |
| Previous Treatment with Second-Line Drugs                 | Yes, No, Unknown                                                                                                                                                    |
| Diabetes Status                                           | Yes, No, Unknown                                                                                                                                                    |
| Smoking Status                                            | Present, Ex, Never, Unknown                                                                                                                                         |
| Alcohol Consumption                                       | Yes, No, Unknown                                                                                                                                                    |
| Injectable Drug Use                                       | Yes, No, Unknown                                                                                                                                                    |
| BCG Vaccinated                                            | Yes, No, Unknown                                                                                                                                                    |
| Health Insurance                                          | Yes, No, Unknown                                                                                                                                                    |
| Type of Health Insurance Coverage                         | Provincial, Interim Federal Health (Refugee Claimant), Private, None, Unknown                                                                                       |
| Patient Status at Diagnosis                               | Alive, Dead                                                                                                                                                         |
| Chest X-Ray Date                                          | (mm/dd/yyyy)                                                                                                                                                        |
| Chest X-Ray Cavitation                                    | Yes, No, Unknown, Not Done                                                                                                                                          |
| Chest X-Ray Bilateral cavitation                          | Yes, No, Unknown, Not Done                                                                                                                                          |
| Chest X-Ray Bilateral disease                             | Yes, No, Unknown, Not Done                                                                                                                                          |
| Total Number of Chest X-Rays during diagnosis             | numeric                                                                                                                                                             |
| Total Number of Chest X-Rays during treatment             | numeric                                                                                                                                                             |
| Total Number of post-treatment Chest X-Rays               | numeric                                                                                                                                                             |
| CT Scan                                                   | Yes, No, Unknown, Not Done                                                                                                                                          |
| Total number of CT Scans during diagnosis                 | numeric                                                                                                                                                             |
| Total number of CT Scans during treatment                 | numeric                                                                                                                                                             |
| Total Number of post-treatment CT scans                   | numeric                                                                                                                                                             |
| Bronchoscopy                                              | Yes, No, Unknown, Not Done                                                                                                                                          |
| Date of Initial Culture                                   | (mm/dd/yyyy)                                                                                                                                                        |
| Baseline culture                                          | Positive, Negative, Unknown, Not Done                                                                                                                               |
| Induced Sputum Procedure                                  | Yes, No, Unknown, Not Done                                                                                                                                          |
| Number of Cultures, Induced, during diagnosis             | numeric                                                                                                                                                             |
| Number of Cultures, not Induced, during diagnosis         | numeric                                                                                                                                                             |
| Total Number of Induced Sputum Procedure(s)               | numeric                                                                                                                                                             |
| Overall Number of Cultures Ordered                        | numeric                                                                                                                                                             |
| Time to Culture Conversion (in days from treatment start) | numeric                                                                                                                                                             |
| Date of Initial Smear                                     | (mm/dd/yyyy)                                                                                                                                                        |
| AFB Smear                                                 | Positive, Negative, Unknown, Not Done                                                                                                                               |
| Number of AFB Smears during diagnosis                     | numeric                                                                                                                                                             |
| Number of AFB Smears during treatment                     | numeric                                                                                                                                                             |
| Number of ECGs                                            | numeric                                                                                                                                                             |
| Number of audiometric tests                               | numeric                                                                                                                                                             |
| Anti-HBc                                                  | Positive, Negative, Unknown, Not Done                                                                                                                               |
| Ag HBs                                                    | Positive, Negative, Unknown, Not Done                                                                                                                               |
| Anti-HBb                                                  | Positive, Negative, Unknown, Not Done                                                                                                                               |
| Hepatitis Blood Draws                                     | numeric                                                                                                                                                             |
| HbA1c                                                     | numeric                                                                                                                                                             |
| Site of TB                                                | Pulmonary, Extrapulmonary                                                                                                                                           |
| Site of EPTB                                              | character                                                                                                                                                           |
| Number of Ultrasounds of abdomen                          | numeric                                                                                                                                                             |

| Variable                                              | Value                           |
|-------------------------------------------------------|---------------------------------|
| Number of Biopsy: endometrium                         | numeric                         |
| Number of X-Rays: chest lordotic view only            | numeric                         |
| Number of X-Rays: Cspine (4 views or more)            | numeric                         |
| Number of MRI: C and T spine C-                       | numeric                         |
| Number of MRI: total spine C-T-L C+                   | numeric                         |
| Number of MRI: head C- C+                             | numeric                         |
| Number of CT Scans: T+ L spine C-                     | numeric                         |
| Number of Puncture: lumbar                            | numeric                         |
| Number of Puncture: other                             | numeric                         |
| Number of Ultrasounds: doppler other                  | numeric                         |
| Number of Ultrasounds: face or neck/ thyroid/ parathy | numeric                         |
| Number of Ultrasounds: doppler abdominal/ pelvis      | numeric                         |
| Number of Ultrasounds: pelvis TVS or TAS              | numeric                         |
| Number of Biopsy: lymph node                          | numeric                         |
| Number of Biopsy: vertebral                           | numeric                         |
| Number of X-Rays: chest 2 views + lordotic view       | numeric                         |
| Number of MRI: total spine C-T-L C+                   | numeric                         |
| Number of MRI: head C- C+                             | numeric                         |
| Number of CT Scans: abdomen and pelvis                | numeric                         |
| Number of Microbiology: tissue bacterial culture      | numeric                         |
| Number of Microbiology: fungus/deep culture           | numeric                         |
| Initial Tuberculin Skin Test Date                     | (mm/dd/yyyy)                    |
| Tuberculin Skin Test Result                           | Positive, Negative, Unknown     |
| Overall number of tuberculin skin test                | numeric                         |
| Initial Interferon-Gamma Release Assay Date           | (mm/dd/yyyy)                    |
| Type of Interferon-Gamma Release Assay                | QuantiFERON, T-SPOT.TB          |
| Interferon-Gamma Release Assay Result                 | Positive, Negative, Unknown     |
| Overall number of Interferon-Gamma Release Assay      | Numeric                         |
| Initial LPA First-Line Specimen Date                  | (mm/dd/yyyy)                    |
| LPA - Isoniazid Resistant                             | Yes, No, Unknown                |
| LPA - Rifampin Resistant                              | Yes, No, Unknown                |
| Overall number of First-Line LPA ordered              | numeric                         |
| Initial Xpert Date                                    | (mm/dd/yyyy)                    |
| Xpert Result                                          | resistant, susceptible, unknown |
| Overall number of Xpert Ordered                       | numeric                         |
| First-Line Phenotypic DST Specimen Date               | (mm/dd/yyyy)                    |
| First-Line Phenotypic DST Results Date                | (mm/dd/yyyy)                    |
| First-Line Phenotypic DST Results Reception Date      | (mm/dd/yyyy)                    |
| Resistance to isoniazid                               | resistant, susceptible, unknown |
| Resistance to rifampin                                | resistant, susceptible, unknown |
| Resistance to ethambutol                              | resistant, susceptible, unknown |
| Resistance to pyrazinamide                            | resistant, susceptible, unknown |
| Resistance to rifabutin                               | resistant, susceptible, unknown |
| Overall Number of First-line phenotypic DST ordered   | numeric                         |
| Resistance to amikacin                                | resistant, susceptible, unknown |
| Resistance to kanamycin                               | resistant, susceptible, unknown |
| Resistance to capreomycin                             | resistant, susceptible, unknown |
| Resistance to ofloxacin                               | resistant, susceptible, unknown |
| Resistance to levofloxacin                            | resistant, susceptible, unknown |
| Resistance to moxifloxacin                            | resistant, susceptible, unknown |
| Resistance to ciprofloxacin                           | resistant, susceptible, unknown |
| Resistance to gatifloxacin                            | resistant, susceptible, unknown |
| Resistance to clofazimine                             | resistant, susceptible, unknown |
| Resistance to ethionamide                             | resistant, susceptible, unknown |
| Resistance to cycloserine                             | resistant, susceptible, unknown |
| Resistance to linezolid                               | resistant, susceptible, unknown |
| Resistance to streptomycin                            | resistant, susceptible, unknown |
| Resistance to PAS                                     | resistant, susceptible, unknown |
| Resistance to amoxicillin-clavulanate                 | resistant, susceptible, unknown |
| Resistance to imipenem-cilastatin                     | resistant, susceptible, unknown |
| Resistance to meropenem                               | resistant, susceptible, unknown |
| Resistance to clarithromycin                          | resistant, susceptible, unknown |
| Resistance to azithromycin                            | resistant, susceptible, unknown |
| Resistance to bedaquiline                             | resistant, susceptible, unknown |
| Resistance to delamanid                               | resistant, susceptible, unknown |
| Overall Number of Second-line phenotypic DST ordered  | numeric                         |
| Hospitalized at Treatment Start?                      | Yes, No                         |
| Duration of Initial Hospitalization (days)            | numeric                         |

| Variable                                                                                | Value                                        |
|-----------------------------------------------------------------------------------------|----------------------------------------------|
| Hospitalized During Treatment?                                                          | Yes, No                                      |
| Reason Hospitalized                                                                     | Adverse Event, Failure, Non-Adherence, Other |
| Length Hospitalized                                                                     | numeric                                      |
| Received isoniazid?                                                                     | Yes, No                                      |
| Record dose, start and stop date, method of administration, frequency of administration | Various                                      |
| Received rifampin?                                                                      | Yes, No                                      |
| Record dose, start and stop date, method of administration, frequency of administration | Various                                      |
| Received ethambutol?                                                                    | Yes, No                                      |
| Record dose, start and stop date, method of administration, frequency of administration | Various                                      |
| Received pyrazinamide?                                                                  | Yes, No                                      |
| Record dose, start and stop date, method of administration, frequency of administration | Various                                      |
| Received rifabutin?                                                                     | Yes, No                                      |
| Record dose, start and stop date, method of administration, frequency of administration | Various                                      |
| Received rifapentine?                                                                   | Yes, No                                      |
| Record dose, start and stop date, method of administration, frequency of administration | Various                                      |
| Received streptomycin?                                                                  | Yes, No                                      |
| Record dose, start and stop date, method of administration, frequency of administration | Various                                      |
| Received capreomycin?                                                                   | Yes, No                                      |
| Record dose, start and stop date, method of administration, frequency of administration | Various                                      |
| Received kanamycin?                                                                     | Yes, No                                      |
| Record dose, start and stop date, method of administration, frequency of administration | Various                                      |
| Received amikacin?                                                                      | Yes, No                                      |
| Record dose, start and stop date, method of administration, frequency of administration | Various                                      |
| Received ofloxacin?                                                                     | Yes, No                                      |
| Record dose, start and stop date, method of administration, frequency of administration | Various                                      |
| Received ciprofloxacin?                                                                 | Yes, No                                      |
| Record dose, start and stop date, method of administration, frequency of administration | Various                                      |
| Received moxifloxacin?                                                                  | Yes, No                                      |
| Record dose, start and stop date, method of administration, frequency of administration | Various                                      |
| Received levofloxacin?                                                                  | Yes, No                                      |
| Record dose, start and stop date, method of administration, frequency of administration | Various                                      |
| Received gatifloxacin?                                                                  | Yes, No                                      |
| Record dose, start and stop date, method of administration, frequency of administration | Various                                      |
| Received linezolid?                                                                     | Yes, No                                      |
| Record dose, start and stop date, method of administration, frequency of administration | Various                                      |
| Received ethionamide?                                                                   | Yes, No                                      |
| Record dose, start and stop date, method of administration, frequency of administration | Various                                      |
| Received prothionamide?                                                                 | Yes, No                                      |
| Record dose, start and stop date, method of administration, frequency of administration | Various                                      |
| Received PAS?                                                                           | Yes, No                                      |
| Record dose, start and stop date, method of administration, frequency of administration | Various                                      |
| Received cycloserine?                                                                   | Yes, No                                      |
| Record dose, start and stop date, method of administration, frequency of administration | Various                                      |
| Received terizidone?                                                                    | Yes, No                                      |
| Record dose, start and stop date, method of administration, frequency of administration | Various                                      |
| Received clofazimine?                                                                   | Yes, No                                      |
| Record dose, start and stop date, method of administration, frequency of administration | Various                                      |

| Variable                                                                                | Value     |
|-----------------------------------------------------------------------------------------|-----------|
| Received imipenem-cilastatin?                                                           | Yes, No   |
| Record dose, start and stop date, method of administration, frequency of administration | Various   |
| Received meropenem?                                                                     | Yes, No   |
| Record dose, start and stop date, method of administration, frequency of administration | Various   |
| Received clarithromycin?                                                                | Yes, No   |
| Record dose, start and stop date, method of administration, frequency of administration | Various   |
| Received amoxicillin-clavulanate?                                                       | Yes, No   |
| Record dose, start and stop date, method of administration, frequency of administration | Various   |
| Received azithromycin?                                                                  | Yes, No   |
| Record dose, start and stop date, method of administration, frequency of administration | Various   |
| Received bedaquiline?                                                                   | Yes, No   |
| Record dose, start and stop date, method of administration, frequency of administration | Various   |
| Received delamanid?                                                                     | Yes, No   |
| Record dose, start and stop date, method of administration, frequency of administration | Various   |
| Received other TB medication?                                                           | Yes, No   |
| Record dose, start and stop date, method of administration, frequency of administration | Various   |
| PICC Line?                                                                              | Yes, No   |
| Number of PICC Line Insertions                                                          | numeric   |
| Given B6?                                                                               | Yes, No   |
| Adjunctive non-TB Med Given?                                                            | Yes, No   |
| Record dose, start and stop date, method of administration, frequency of administration | Various   |
| AST Measurements                                                                        | numeric   |
| ALP Measurements                                                                        | numeric   |
| ALT Measurements                                                                        | numeric   |
| Creatinine Measurements                                                                 | numeric   |
| Bilirubin Measurements                                                                  | numeric   |
| CBC Measurements                                                                        | numeric   |
| Albumin Measurements                                                                    | numeric   |
| TSH Measurements                                                                        | numeric   |
| Mg Measurements                                                                         | numeric   |
| Urea Measurements                                                                       | numeric   |
| Calcium Measurements                                                                    | numeric   |
| Phosphate Measurements                                                                  | numeric   |
| Sodium Measurements                                                                     | numeric   |
| Potassium Measurements                                                                  | numeric   |
| Chloride Measurements                                                                   | numeric   |
| Amikacin Serum Measurements                                                             | numeric   |
| Other serum drug level measurements                                                     | numeric   |
| Liver transaminase panel measurements (not included elsewhere)                          | numeric   |
| Number of blood draws                                                                   | numeric   |
| Therapeutic drug monitoring done                                                        | Yes, No   |
| Number of TDM tests sent out                                                            | numeric   |
| Incentives Given?                                                                       | Yes, No   |
| Type of Incentive                                                                       | character |
| Value of Incentive                                                                      | numeric   |
| Case manager?                                                                           | Yes, No   |
| Number of Contacts Investigated - HOME (PRIMARY)                                        | numeric   |
| Number of Contacts Investigated - HOME (SECONDARY)                                      | numeric   |
| Number of Contacts Investigated - SOCIAL (PRIMARY)                                      | numeric   |
| Number of Contacts Investigated - SOCIAL (SECONDARY)                                    | numeric   |
| Number of Contacts Investigated - SCHOOL & WORK (PRIMARY)                               | numeric   |
| Number of Contacts Investigated - SCHOOL & WORK (SECONDARY)                             | numeric   |
| Number of Contacts Investigated - TRAVEL (PRIMARY)                                      | numeric   |

| Variable                                                                                         | Value                                                      |
|--------------------------------------------------------------------------------------------------|------------------------------------------------------------|
| Number of Contacts Investigated - TRAVEL (SECONDARY)                                             | numeric                                                    |
| Number of Contacts Investigated - UNASIGNED & OTHER                                              | numeric                                                    |
| No. of Emergency Department Visits                                                               | numeric                                                    |
| Clinic Visits (Doctor); stratified diagnosis, treatment, post-treatment                          | numeric                                                    |
| Clinic Visits (Resident); stratified diagnosis, treatment, post-treatment                        | numeric                                                    |
| Clinic Visits (Internal Medicine); stratified diagnosis, treatment, post-treatment               | numeric                                                    |
| Clinic Visits (Specialist) - Psychiatry; stratified diagnosis, treatment, post-treatment         | numeric                                                    |
| Clinic Visits (Specialist) - Ophthalmologist; stratified diagnosis, treatment, post-treatment    | numeric                                                    |
| Clinic Visits (Specialist) - ENT; stratified diagnosis, treatment, post-treatment                | numeric                                                    |
| Physician (Specialist) - Neurologist; stratified diagnosis, treatment, post-treatment            | numeric                                                    |
| Clinic Visits (Specialist) - Gastroenterologist; stratified diagnosis, treatment, post-treatment | numeric                                                    |
| Clinic Visits (Specialist) - Dermatologist; stratified diagnosis, treatment, post-treatment      | numeric                                                    |
| Clinic Visits (Specialist) - Hematologist; stratified diagnosis, treatment, post-treatment       | numeric                                                    |
| Clinic Visits (Specialist) - Nutritionist; stratified diagnosis, treatment, post-treatment       | numeric                                                    |
| Nurse Phone Calls; stratified diagnosis, treatment, post-treatment                               | numeric                                                    |
| MD Phone Calls; stratified diagnosis, treatment, post-treatment                                  | numeric                                                    |
| Overall Number of Patient Visits to Clinic; stratified diagnosis, treatment, post-treatment      | numeric                                                    |
| Number of Home Visits; stratified diagnosis, treatment, post-treatment                           | numeric                                                    |
| Number of Times an Interpreter was Used; stratified diagnosis, treatment, post-treatment         | numeric                                                    |
| Social worker visits; stratified diagnosis, treatment, post-treatment                            | numeric                                                    |
| Overall DOT Visits                                                                               | numeric                                                    |
| Number of Pharmacy DOT Visits                                                                    | numeric                                                    |
| Number of Clinic DOT Visits                                                                      | numeric                                                    |
| Number of Home DOT Visits                                                                        | numeric                                                    |
| Isolated?                                                                                        | Yes, No, Unknown                                           |
| Isolation Start Date                                                                             | (mm/dd/yyyy)                                               |
| Isolation Stop Date                                                                              | (mm/dd/yyyy)                                               |
| Medication Discontinued?                                                                         | Yes, No                                                    |
| Drug Stopped                                                                                     | character                                                  |
| Reason Drug Discontinued                                                                         | character                                                  |
| Type of AE                                                                                       | character                                                  |
| Did Patient Start Alternate TB Therapy?                                                          | Yes, No                                                    |
| Specify New TB Therapy                                                                           | character                                                  |
| Final Treatment Outcome                                                                          | Complete, Death, Failure, Adverse Event, Lost to Follow-up |
| Date of Final Outcome                                                                            | (mm/dd/yyyy)                                               |
| Duration of Treatment (days)                                                                     | numeric                                                    |
| Adherence                                                                                        | At Least 80%, Less Than 80%                                |
| If Died, Related to TB?                                                                          | Yes, No                                                    |
| Were Post-Treatment Monitoring Services Provided?                                                | Yes, No, Unknown                                           |
| Duration of Post-Treatment Monitoring (days)                                                     | numeric                                                    |
| Did Patient Experience Recurrence?                                                               | Yes, No, Unknown                                           |
| Date of Recurrence                                                                               | (mm/dd/yyyy)                                               |

Abbreviations: TB, tuberculosis; LPA, line probe assay; DOT, directly observed therapy; MD, medical doctor; AE, adverse event; DST, drug susceptibility test; AFB, acid-fast bacilli; ART, antiretroviral therapy

**Appendix Table 2.** Data Fields for Costs Considered

| Item                                                              | Comment (if necessary)                                               |
|-------------------------------------------------------------------|----------------------------------------------------------------------|
| Inpatient Costs                                                   |                                                                      |
| Per day in the hospital                                           |                                                                      |
| Physician visit                                                   |                                                                      |
| Resident visit                                                    |                                                                      |
| Psychiatry visit                                                  |                                                                      |
| Nutritionist visit                                                |                                                                      |
| Ophthalmologist visit                                             |                                                                      |
| Neurologist visit                                                 |                                                                      |
| Gastroenterologist visit                                          |                                                                      |
| Hematologist visit                                                |                                                                      |
| Other Costs (Diagnosis, Treatment, Post-Treatment, Public Health) |                                                                      |
| Tuberculin Skin Test                                              |                                                                      |
| Interferon-Gamma Release Assay                                    |                                                                      |
| HIV Test                                                          | Missing from Ontario                                                 |
| Chest X-Ray                                                       |                                                                      |
| Smear (for TB)                                                    |                                                                      |
| Culture (for TB)                                                  |                                                                      |
| Sputum Induction                                                  |                                                                      |
| First Line DST                                                    |                                                                      |
| Second Line DST                                                   |                                                                      |
| First Line LPA                                                    |                                                                      |
| Second Line LPA                                                   |                                                                      |
| Xpert MTB/RIF                                                     |                                                                      |
| Ultrasound (various)                                              |                                                                      |
| Biopsy (various)                                                  |                                                                      |
| MRI (various) costs                                               |                                                                      |
| CT scan (various) costs                                           |                                                                      |
| Fungal Culture                                                    |                                                                      |
| Bacterial Culture                                                 |                                                                      |
| Lumbar Puncture                                                   |                                                                      |
| Bronchoscopy                                                      |                                                                      |
| HBA1c                                                             |                                                                      |
| Hepatitis B Serology                                              |                                                                      |
| Hepatitis C Serology                                              |                                                                      |
| Blood Draw Cost                                                   |                                                                      |
| Initial Physician Consultation                                    |                                                                      |
| Initial Ophthalmology Consultation                                |                                                                      |
| Initial ENT Consultation                                          |                                                                      |
| Initial Gastroenterologist Consultation                           |                                                                      |
| Initial Dermatologist Consultation                                |                                                                      |
| Initial Hematology Consultation                                   |                                                                      |
| Nutritionist Visit                                                |                                                                      |
| Chest X-Ray Interpretation                                        |                                                                      |
| Interpreter                                                       |                                                                      |
| Isoniazid                                                         | Specify dose and cost for formulation                                |
| Rifampin                                                          | Specify dose and cost for formulation                                |
| Pyrazinamide                                                      | Specify dose and cost for formulation                                |
| Ethambutol                                                        | Specify dose and cost for formulation                                |
| Rifapentine                                                       | Specify dose and cost for formulation                                |
| Rifabutin                                                         | Specify dose and cost for formulation                                |
| Streptomycin                                                      | Specify dose and cost for formulation                                |
| Amikacin                                                          | Specify dose and cost for formulation                                |
| Capreomycin                                                       | Specify dose and cost for formulation                                |
| Kanamycin                                                         | Specify dose and cost for formulation                                |
| Moxifloxacin                                                      | Specify dose and cost for formulation                                |
| Levofloxacin                                                      | Specify dose and cost for formulation                                |
| Gatifloxacin                                                      | Specify dose and cost for formulation                                |
| Ofloxacin                                                         | Specify dose and cost for formulation                                |
| Ciprofloxacin                                                     | Specify dose and cost for formulation                                |
| Linezolid                                                         | Specify dose and cost for formulation                                |
| Clofazimine                                                       | Specify dose and cost for formulation                                |
| Ethionamide                                                       | Specify dose and cost for formulation; cost only available in Quebec |
| Prothionamide                                                     | Specify dose and cost for formulation                                |
| Cycloserine                                                       | Specify dose and cost for formulation                                |
| Terizidone                                                        | Specify dose and cost for formulation                                |
| Bedaquiline                                                       | Specify dose and cost for formulation                                |

| Item                                      | Comment (if necessary)                                                         |
|-------------------------------------------|--------------------------------------------------------------------------------|
| Delamanid                                 | Specify dose and cost for formulation                                          |
| Imipenem-Cilastatin                       | Specify dose and cost for formulation                                          |
| Meropenem                                 | Specify dose and cost for formulation                                          |
| Amoxicillin-Clavulanate                   | Specify dose and cost for formulation                                          |
| Clarithromycin                            | Specify dose and cost for formulation                                          |
| Azithromycin                              | Specify dose and cost for formulation                                          |
| PAS                                       | Specify dose and cost for formulation                                          |
| Other TB Medication or Adjunct Drug Given | Specify type of drug, dose, and cost                                           |
| AST                                       |                                                                                |
| ALP                                       |                                                                                |
| ALT                                       |                                                                                |
| Creatinine                                |                                                                                |
| Bilirubin                                 |                                                                                |
| CBC                                       |                                                                                |
| Sodium                                    |                                                                                |
| Potassium                                 |                                                                                |
| Chloride                                  |                                                                                |
| Calcium                                   |                                                                                |
| Magnesium                                 |                                                                                |
| Phosphate                                 |                                                                                |
| Albumin                                   |                                                                                |
| Urea                                      |                                                                                |
| TSH                                       |                                                                                |
| Amikacin Drug Levels                      | Missing for Ontario                                                            |
| Drug Levels for Other Drugs               |                                                                                |
| ECG Measurement                           |                                                                                |
| Audiometry Assessment                     |                                                                                |
| Follow-up Physician Visit                 |                                                                                |
| Follow-up Ophthalmology Visit             |                                                                                |
| Follow-up ENT Visit                       |                                                                                |
| Follow-up Gastroenterologist Visit        |                                                                                |
| Follow-up Dermatologist Visit             |                                                                                |
| Follow-up Hematology Visit                |                                                                                |
| Nurse Home Visit                          | Missing for Ontario                                                            |
| Social Worker Visit                       |                                                                                |
| Home Visit for DOT                        | Per visit; microcosting information missing for Ontario—used top-down approach |
| Clinic Visit for DOT                      | Per visit; microcosting information missing for Ontario—used top-down approach |
| Pharmacy Visit DOT                        | Per visit; microcosting information missing for Ontario—used top-down approach |
| Contact Investigation                     | Per contact; only available in Ontario                                         |
| Incentives                                |                                                                                |
| Emergency Room Visit                      |                                                                                |

Abbreviations: TB, tuberculosis; LPA, line probe assay; DOT, directly observed therapy; MD, medical doctor; AE, adverse event; DST, drug susceptibility test; AFB, acid-fast bacilli; ART, antiretroviral therapy.



**Appendix Table 3.** Predictors Considered in Regression Analyses

| All Forms of TB           | TB Infection                          | DS-TB                                      | INHR-TB                                    | MDR-TB                                                           |
|---------------------------|---------------------------------------|--------------------------------------------|--------------------------------------------|------------------------------------------------------------------|
| Type of TB                | Age (<40y vs. ≥40y)                   | Age (<40y vs. ≥40y)                        | Age (<40y vs. ≥40y)                        | Age (<40y vs. ≥40y)                                              |
| Age (<40y vs. ≥40y)       | Sex                                   | Sex                                        | Sex                                        | Sex                                                              |
| Sex                       | Adverse Events (0 vs. ≥1)             | Adverse Events (0 vs. ≥1)                  | Adverse Events (0 vs. ≥1)                  | Adverse Events (0 vs. ≥1)                                        |
| Adverse Events (0 vs. ≥1) | HIV                                   | HIV                                        | HIV                                        | HIV                                                              |
| HIV                       | Diabetes                              | Diabetes                                   | Diabetes                                   | Diabetes                                                         |
| Diabetes                  | Starting Regimen (Rifampin vs. Other) | Hospitalization (<2mo vs. ≥2mo)            | Hospitalization (<2mo vs. ≥2mo)            | Hospitalization (<2mo vs. ≥2mo)                                  |
|                           |                                       | Sputum Smear                               | Sputum Smear                               | Sputum Smear                                                     |
|                           |                                       | Cavities on Chest X-Ray                    | Cavities on Chest X-Ray                    | Cavities on Chest X-Ray                                          |
|                           |                                       | TB Location (Pulmonary vs. Extrapulmonary) | TB Location (Pulmonary vs. Extrapulmonary) | TB Location (Pulmonary vs. Extrapulmonary)                       |
|                           |                                       | Culture Conversion Time (<2mo vs. ≥2mo)    | Culture Conversion Time (<2mo vs. ≥2mo)    | Culture Conversion Time (<2mo vs. ≥2mo)                          |
|                           |                                       | Number of Contacts Received DOT            | Number of Contacts Received DOT            | Number of Contacts Received DOT                                  |
|                           |                                       |                                            |                                            | Resistance (Susceptible to both Fluoroquinolone and SLI vs. Not) |

Abbreviations: TB, tuberculosis; DS-TB, drug-susceptible tuberculosis; INHR-TB, isoniazid-resistant tuberculosis; MDR-TB, multidrug-resistant tuberculosis; DOT, directly observed therapy; SLI, second-line injectable

**Appendix Table 4.** Median Costs for Each Form of Tuberculosis Stratified by Demographic Characteristics and Treatment Outcomes

| Group Comparison                                  | TB Infection                 | DS-TB                              | INHR-TB                            | MDR-TB                                 |
|---------------------------------------------------|------------------------------|------------------------------------|------------------------------------|----------------------------------------|
| Age <40 Years                                     | n = 53                       | n = 41                             | n = 30                             | n = 36                                 |
| Median (IQR) Total Costs                          | \$694 (IQR: \$574 to \$1101) | \$11,299 (IQR: \$4089 to \$25,435) | \$15,287 (IQR: \$7029 to \$35,608) | \$119,531 (IQR: \$87,476 to \$169,970) |
| Median (IQR) Cost of Diagnosis                    | \$252 (IQR: \$194 to \$367)  | \$714 (IQR: \$488 to \$1001)       | \$786 (IQR: \$688 to \$1051)       | \$1083 (IQR: \$974 to \$1334)          |
| Median (IQR) Cost of Treatment                    | \$437 (IQR: \$350 to \$710)  | \$2116 (IQR: \$1615 to \$2615)     | \$2685 (IQR: \$2110 to \$3716)     | \$68,870 (IQR: \$35,063 to \$117,520)  |
| Median (IQR) Cost of Post-Treatment Monitoring    | \$0 (IQR: \$0 to \$0)        | \$137 (IQR: \$0 to \$352)          | \$109 (IQR: \$70 to \$151)         | \$174 (IQR: \$54 to \$326)             |
| Median (IQR) Cost of Hospitalization              | \$0 (IQR: \$0 to \$0)        | \$0 (IQR: \$0 to \$15,600)         | \$4128 (IQR: \$0 to \$13,812)      | \$41,781 (IQR: \$35,075 to \$53,811)   |
| Median (IQR) Cost for Public Health Interventions | \$0 (IQR: \$0 to \$0)        | \$2308 (IQR: \$577 to \$5232)      | \$5028 (IQR: \$1731 to \$6212)     | \$6490 (IQR: \$4655 to \$6864)         |
| Age ≥40 Years                                     | n = 37                       | n = 49                             | n = 41                             | n = 26                                 |
| Median (IQR) Total Costs                          | \$870 (IQR: \$690 to \$1350) | \$12,441 (IQR: \$6698 to \$23,062) | \$23,461 (IQR: \$7341 to \$41,396) | \$110981 (IQR: \$72600 to \$150,573)   |
| Median (IQR) Cost of Diagnosis                    | \$274 (IQR: \$217 to \$414)  | \$684 (IQR: \$604 to \$1034)       | \$828 (IQR: \$618 to \$1043)       | \$1042 (IQR: \$925 to \$1313)          |
| Median (IQR) Cost of Treatment                    | \$589 (IQR: \$427 to \$808)  | \$2150 (IQR: \$1585 to \$3423)     | \$3226 (IQR: \$2345 to \$4040)     | \$45,853 (IQR: \$21,294 to \$96,920)   |
| Median (IQR) Cost of Post-Treatment Monitoring    | \$0 (IQR: \$0 to \$0)        | \$141 (IQR: \$54 to \$277)         | \$145 (IQR: \$26 to \$274)         | \$220 (IQR: \$16 to \$367)             |
| Median (IQR) Cost of Hospitalization              | \$0 (IQR: \$0 to \$0)        | \$3900 (IQR: \$0 to \$14,950)      | \$13,000 (IQR: \$0 to \$31,856)    | \$40,815 (IQR: \$35,542 to \$61,413)   |
| Median (IQR) Cost for Public Health Interventions | \$0 (IQR: \$0 to \$0)        | \$3462 (IQR: \$697 to \$5232)      | \$2885 (IQR: \$581 to \$6115)      | \$6378 (IQR: \$4657 to \$6754)         |
| Female Sex                                        | n = 55                       | n = 50                             | n = 38                             | n = 34                                 |
| Median (IQR) Total Costs                          | \$853 (IQR: \$592 to \$1333) | \$13,831 (IQR: \$5203 to \$27,262) | \$14,907 (IQR: \$6767 to \$33,751) | \$116,751 (IQR: \$87,240 to \$178,390) |
| Median (IQR) Cost of Diagnosis                    | \$315 (IQR: \$217 to \$362)  | \$737 (IQR: \$600 to \$1112)       | \$709 (IQR: \$581 to \$994)        | \$1015 (IQR: \$894 to \$1322)          |
| Median (IQR) Cost of Treatment                    | \$550 (IQR: \$385 to \$818)  | \$2203 (IQR: \$1693 to \$3249)     | \$2490 (IQR: \$2077 to \$3898)     | \$59,343 (IQR: \$30,591 to \$111,895)  |
| Median (IQR) Cost of Post-Treatment Monitoring    | \$0 (IQR: \$0 to \$18)       | \$139 (IQR: \$53 to \$282)         | \$120 (IQR: \$47 to \$177)         | \$270 (IQR: \$71 to \$399)             |
| Median (IQR) Cost of Hospitalization              | \$0 (IQR: \$0 to \$0)        | \$0 (IQR: \$0 to \$18,095)         | \$9750 (IQR: \$0 to \$21,775)      | \$45,654 (IQR: \$35,822 to \$62,650)   |
| Median (IQR) Cost for Public Health Interventions | \$0 (IQR: \$0 to \$0)        | \$2885 (IQR: \$1154 to \$5353)     | \$2596 (IQR: \$1154 to \$5702)     | \$6390 (IQR: \$4736 to \$6876)         |
| Male Sex                                          | n = 35                       | n = 40                             | n = 33                             | n = 28                                 |
| Median (IQR) Total Costs                          | \$748 (IQR: \$587 to \$1008) | \$11,533 (IQR: \$3678 to \$17,340) | \$24,279 (IQR: \$8997 to \$43,494) | \$119,051 (IQR: \$76,174 to \$151,917) |
| Median (IQR) Cost of Diagnosis                    | \$217 (IQR: \$216 to \$380)  | \$684 (IQR: \$498 to \$911)        | \$883 (IQR: \$785 to \$1119)       | \$1093 (IQR: \$1052 to \$1331)         |
| Median (IQR) Cost of Treatment                    | \$476 (IQR: \$370 to \$659)  | \$2042 (IQR: \$1559 to \$2679)     | \$3225 (IQR: \$2496 to \$3936)     | \$62,567 (IQR: \$30,105 to \$101,609)  |
| Median (IQR) Cost of Post-Treatment Monitoring    | \$0 (IQR: \$0 to \$0)        | \$139 (IQR: \$0 to \$283)          | \$130 (IQR: \$26 to \$224)         | \$145 (IQR: \$0 to \$276)              |
| Median (IQR) Cost of Hospitalization              | \$0 (IQR: \$0 to \$0)        | \$3250 (IQR: \$0 to \$8775)        | \$11,050 (IQR: \$0 to \$31,054)    | \$39,476 (IQR: \$33,962 to \$50,457)   |
| Median (IQR) Cost for Public Health Interventions | \$0 (IQR: \$0 to \$0)        | \$3462 (IQR: \$542 to \$5224)      | \$5440 (IQR: \$1094 to \$6220)     | \$6409 (IQR: \$4163 to \$6728)         |
| No Drug Stopped due to Adverse Event              | n = 83                       | n = 52                             | n = 42                             | n = 10                                 |
| Median (IQR) Total Costs                          | \$781 (IQR: \$587 to \$1194) | \$7101 (IQR: \$3678 to \$18,584)   | \$13,422 (IQR: \$5297 to \$33,751) | \$97,683 (IQR: \$79,455 to \$124,357)  |
| Median (IQR) Cost of Diagnosis                    | \$252 (IQR: \$204 to \$345)  | \$701 (IQR: \$498 to \$981)        | \$818 (IQR: \$659 to \$1003)       | \$1083 (IQR: \$1074 to \$1098)         |
| Median (IQR) Cost of Treatment                    | \$496 (IQR: \$374 to \$757)  | \$2044 (IQR: \$1559 to \$2617)     | \$2556 (IQR: \$2091 to \$3274)     | \$52,304 (IQR: \$30,894 to \$100,856)  |
| Median (IQR) Cost of Post-Treatment Monitoring    | \$0 (IQR: \$0 to \$0)        | \$139 (IQR: \$48 to \$327)         | \$121 (IQR: \$12 to \$177)         | \$79 (IQR: \$62 to \$182)              |
| Median (IQR) Cost of Hospitalization              | \$0 (IQR: \$0 to \$0)        | \$0 (IQR: \$0 to \$8450)           | \$2002 (IQR: \$0 to \$15,337)      | \$37,671 (IQR: \$34,764 to \$41,731)   |
| Median (IQR) Cost for Public Health Interventions | \$0 (IQR: \$0 to \$0)        | \$2308 (IQR: \$542 to \$5218)      | \$2596 (IQR: \$1154 to \$6029)     | \$6365 (IQR: \$2277 to \$6628)         |

| Group Comparison                                  | TB Infection                  | DS-TB                               | INHR-TB                              | MDR-TB                                 |
|---------------------------------------------------|-------------------------------|-------------------------------------|--------------------------------------|----------------------------------------|
| At Least One Drug Stopped due to Adverse Event    | n = 7                         | n = 38                              | n = 29                               | n = 52                                 |
| Median (IQR) Total Costs                          | \$1037 (IQR: \$959 to \$1230) | \$14,099 (IQR: \$7921 to \$27,465)  | \$24,585 (IQR: \$13,255 to \$51,242) | \$121,660 (IQR: \$82,641 to \$166,115) |
| Median (IQR) Cost of Diagnosis                    | \$367 (IQR: \$336 to \$424)   | \$718 (IQR: \$594 to \$1064)        | \$857 (IQR: \$661 to \$1054)         | \$1083 (IQR: \$892 to \$1334)          |
| Median (IQR) Cost of Treatment                    | \$710 (IQR: \$550 to \$774)   | \$2408 (IQR: \$1922 to \$3405)      | \$3613 (IQR: \$2448 to \$4474)       | \$61,426 (IQR: \$30,004 to \$111,807)  |
| Median (IQR) Cost of Post-Treatment Monitoring    | \$0 (IQR: \$0 to \$9)         | \$128 (IQR: \$0 to \$253)           | \$133 (IQR: \$66 to \$274)           | \$237 (IQR: \$0 to \$357)              |
| Median (IQR) Cost of Hospitalization              | \$0 (IQR: \$0 to \$0)         | \$5525 (IQR: \$0 to \$19,339)       | \$15,028 (IQR: \$4550 to \$37,470)   | \$43,486 (IQR: \$35,334 to \$60,823)   |
| Median (IQR) Cost for Public Health Interventions | \$0 (IQR: \$0 to \$0)         | \$4039 (IQR: \$1298 to \$5695)      | \$5193 (IQR: \$581 to \$6218)        | \$6437 (IQR: \$4740 to \$6860)         |
| Completed Treatment                               | n = 77                        | n = 83                              | n = 63                               | n = 49                                 |
| Median (IQR) Total Costs                          | \$851 (IQR: \$596 to \$1244)  | \$11,855 (IQR: \$4259 to \$25,450)  | \$22,110 (IQR: \$7390 to \$42,445)   | \$125,978 (IQR: \$86,108 to \$165,586) |
| Median (IQR) Cost of Diagnosis                    | \$252 (IQR: \$194 to \$393)   | \$694 (IQR: \$513 to \$1017)        | \$817 (IQR: \$657 to \$1002)         | \$1083 (IQR: \$926 to \$1331)          |
| Median (IQR) Cost of Treatment                    | \$555 (IQR: \$392 to \$784)   | \$2157 (IQR: \$1656 to \$3242)      | \$3063 (IQR: \$2362 to \$4052)       | \$63,096 (IQR: \$34,455 to \$112,913)  |
| Median (IQR) Cost of Post-Treatment Monitoring    | \$0 (IQR: \$0 to \$18)        | \$141 (IQR: \$53 to \$297)          | \$132 (IQR: \$88 to \$210)           | \$220 (IQR: \$64 to \$320)             |
| Median (IQR) Cost of Hospitalization              | \$0 (IQR: \$0 to \$0)         | \$0 (IQR: \$0 to \$16250)           | \$11,050 (IQR: \$0 to \$31,528)      | \$40,952 (IQR: \$35,412 to \$54,112)   |
| Median (IQR) Cost for Public Health Interventions | \$0 (IQR: \$0 to \$0)         | \$2885 (IQR: \$577 to \$5232)       | \$3096 (IQR: \$1141 to \$6188)       | \$6570 (IQR: \$5557 to \$6901)         |
| Did Not Complete Treatment                        | n = 13                        | n = 7                               | n = 8                                | n = 13                                 |
| Median (IQR) Total Costs                          | \$549 (IQR: \$368 to \$818)   | \$12,441 (IQR: \$10104 to \$18,574) | \$11,480 (IQR: \$6255 to \$16,632)   | \$85,770 (IQR: \$71,565 to \$118,534)  |
| Median (IQR) Cost of Diagnosis                    | \$327 (IQR: \$217 to \$337)   | \$831 (IQR: \$654 to \$982)         | \$1057 (IQR: \$727 to \$1104)        | \$1077 (IQR: \$924 to \$1224)          |
| Median (IQR) Cost of Treatment                    | \$211 (IQR: \$150 to \$481)   | \$1188 (IQR: \$303 to \$2168)       | \$1512 (IQR: \$1319 to \$1871)       | \$36,121 (IQR: \$16,585 to \$71,601)   |
| Median (IQR) Cost of Post-Treatment Monitoring    | \$0 (IQR: \$0 to \$0)         | \$0 (IQR: \$0 to \$0)               | \$0 (IQR: \$0 to \$47)               | \$0 (IQR: \$0 to \$399)                |
| Median (IQR) Cost of Hospitalization              | \$0 (IQR: \$0 to \$0)         | \$3900 (IQR: \$1950 to \$10,400)    | \$1300 (IQR: \$0 to \$11,212)        | \$41,480 (IQR: \$35,100 to \$61,708)   |
| Median (IQR) Cost for Public Health Interventions | \$0 (IQR: \$0 to \$0)         | \$4874 (IQR: \$2020 to \$5908)      | \$1154 (IQR: \$577 to \$3091)        | \$5096 (IQR: \$4616 to \$6071)         |

Abbreviations: IQR, interquartile range; TB, tuberculosis; DS-TB, drug-susceptible tuberculosis; INHR-TB, isoniazid-resistant tuberculosis; MDR-TB, multidrug-resistant tuberculosis

**Appendix Table 5.** Mean Costs for Each Form of Tuberculosis Stratified by Demographic Characteristics and Treatment Outcomes

| Group Comparison                               | TB Infection | DS-TB    | INHR-TB  | MDR-TB    |
|------------------------------------------------|--------------|----------|----------|-----------|
| Age <40 Years                                  | n = 53       | n = 41   | n = 30   | n = 36    |
| Mean Total Costs                               | \$842        | \$14,875 | \$36,138 | \$142,532 |
| Mean Cost of Diagnosis                         | \$289        | \$774    | \$879    | \$1,236   |
| Mean Cost of Treatment                         | \$533        | \$2,459  | \$4,480  | \$83,650  |
| Mean Cost of Post-Treatment Monitoring         | \$20         | \$189    | \$124    | \$226     |
| Mean Cost of Hospitalization                   | \$0          | \$7,553  | \$20,674 | \$49,508  |
| Mean Cost for Public Health Interventions      | \$0          | \$3,900  | \$9,980  | \$7,913   |
| Age ≥40 Years                                  | n = 37       | n = 49   | n = 41   | n = 26    |
| Mean Total Costs                               | \$1,024      | \$16,523 | \$29,567 | \$116,893 |
| Mean Cost of Diagnosis                         | \$335        | \$802    | \$846    | \$1,229   |
| Mean Cost of Treatment                         | \$665        | \$2,691  | \$4,759  | \$62,331  |
| Mean Cost of Post-Treatment Monitoring         | \$24         | \$173    | \$197    | \$267     |
| Mean Cost of Hospitalization                   | \$0          | \$9,452  | \$19,443 | \$47,798  |
| Mean Cost for Public Health Interventions      | \$0          | \$3,405  | \$4,322  | \$5,269   |
| Female Sex                                     | n = 55       | n = 50   | n = 38   | n = 34    |
| Mean Total Costs                               | \$962        | \$16,827 | \$32,564 | \$144,151 |
| Mean Cost of Diagnosis                         | \$317        | \$845    | \$781    | \$1,158   |
| Mean Cost of Treatment                         | \$619        | \$2,631  | \$5,511  | \$82,182  |
| Mean Cost of Post-Treatment Monitoring         | \$26         | \$185    | \$161    | \$295     |
| Mean Cost of Hospitalization                   | \$0          | \$9,333  | \$22,541 | \$53,881  |
| Mean Cost for Public Health Interventions      | \$0          | \$3,832  | \$3,570  | \$6,635   |
| Male Sex                                       | n = 35       | n = 40   | n = 33   | n = 28    |
| Mean Total Costs                               | \$846        | \$14,454 | \$32,089 | \$116,759 |
| Mean Cost of Diagnosis                         | \$293        | \$719    | \$951    | \$1,324   |
| Mean Cost of Treatment                         | \$537        | \$2,528  | \$3,640  | \$65,636  |
| Mean Cost of Post-Treatment Monitoring         | \$16         | \$175    | \$172    | \$180     |
| Mean Cost of Hospitalization                   | \$0          | \$7,655  | \$16,994 | \$42,609  |
| Mean Cost for Public Health Interventions      | \$0          | \$3,378  | \$10,332 | \$7,010   |
| No Drug Stopped due to Adverse Event           | n = 83       | n = 52   | n = 42   | n = 10    |
| Mean Total Costs                               | \$901        | \$13,258 | \$30,559 | \$106,475 |
| Mean Cost of Diagnosis                         | \$301        | \$770    | \$860    | \$1,300   |
| Mean Cost of Treatment                         | \$577        | \$2,313  | \$4,040  | \$61,450  |
| Mean Cost of Post-Treatment Monitoring         | \$22         | \$202    | \$149    | \$139     |
| Mean Cost of Hospitalization                   | \$0          | \$6,624  | \$17,900 | \$38,669  |
| Mean Cost for Public Health Interventions      | \$0          | \$3,349  | \$7,610  | \$4,916   |
| At Least One Drug Stopped due to Adverse Event | n = 7        | n = 38   | n = 29   | n = 52    |
| Mean Total Costs                               | \$1,105      | \$19,212 | \$34,926 | \$136,647 |
| Mean Cost of Diagnosis                         | \$386        | \$815    | \$859    | \$1,220   |
| Mean Cost of Treatment                         | \$703        | \$2,957  | \$5,512  | \$77,260  |
| Mean Cost of Post-Treatment Monitoring         | \$17         | \$151    | \$190    | \$263     |
| Mean Cost of Hospitalization                   | \$0          | \$11,274 | \$22,951 | \$50,737  |
| Mean Cost for Public Health Interventions      | \$0          | \$4,015  | \$5,415  | \$7,168   |
| Completed Treatment                            | n = 77       | n = 83   | n = 63   | n = 49    |
| Mean Total Costs                               | \$964        | \$15,810 | \$34,395 | \$139,645 |
| Mean Cost of Diagnosis                         | \$309        | \$787    | \$851    | \$1,245   |
| Mean Cost of Treatment                         | \$630        | \$2,692  | \$5,023  | \$80,927  |
| Mean Cost of Post-Treatment Monitoring         | \$24         | \$193    | \$182    | \$247     |
| Mean Cost of Hospitalization                   | \$0          | \$8,585  | \$21,827 | \$49,795  |
| Mean Cost for Public Health Interventions      | \$0          | \$3,553  | \$6,512  | \$7,430   |
| Did Not Complete Treatment                     | n = 13       | n = 7    | n = 8    | n = 13    |
| Mean Total Costs                               | \$638        | \$15,327 | \$16,183 | \$102,137 |
| Mean Cost of Diagnosis                         | \$298        | \$815    | \$933    | \$1,186   |
| Mean Cost of Treatment                         | \$332        | \$1,318  | \$1,634  | \$51,276  |
| Mean Cost of Post-Treatment Monitoring         | \$8          | \$37     | \$40     | \$226     |
| Mean Cost of Hospitalization                   | \$0          | \$8,608  | \$5,281  | \$45,004  |
| Mean Cost for Public Health Interventions      | \$0          | \$4,549  | \$8,295  | \$4,445   |

Abbreviations: IQR, interquartile range; TB, tuberculosis; DS-TB, drug-susceptible tuberculosis; INHR-TB, isoniazid-resistant tuberculosis; MDR-TB, multidrug-resistant tuberculosis

**Appendix Table 6.** Median Costs for Each Form of Tuberculosis Stratified by Clinical Characteristics and Hospitalization

| Group Comparison                                  | DS-TB                                | INH-R-TB                              | MDR-TB                                  |
|---------------------------------------------------|--------------------------------------|---------------------------------------|-----------------------------------------|
| No Hospitalization or Hospitalization <2 months   | n = 85                               | n = 58                                | n = 16                                  |
| Median (IQR) Total Costs                          | \$11,394 (IQR: \$4228 to \$19,389)   | \$13,580 (IQR: \$6193 to \$24,923)    | \$97,215 (IQR: \$54,858 to \$140,209)   |
| Median (IQR) Cost of Diagnosis                    | \$694 (IQR: \$518 to \$1001)         | \$818 (IQR: \$662 to \$1041)          | \$996 (IQR: \$729 to \$1210)            |
| Median (IQR) Cost of Treatment                    | \$2116 (IQR: \$1606 to \$2910)       | \$2816 (IQR: \$2211 to \$3757)        | \$59,331 (IQR: \$19,431 to \$108,429)   |
| Median (IQR) Cost of Post-Treatment Monitoring    | \$141 (IQR: \$34 to \$296)           | \$121 (IQR: \$12 to \$191)            | \$193 (IQR: \$116 to \$305)             |
| Median (IQR) Cost of Hospitalization              | \$0 (IQR: \$0 to \$11,429)           | \$4128 (IQR: \$0 to \$13,975)         | \$24,621 (IQR: \$17,790 to \$31,355)    |
| Median (IQR) Cost for Public Health Interventions | \$2885 (IQR: \$577 to \$5311)        | \$2885 (IQR: \$1134 to \$5764)        | \$5109 (IQR: \$654 to \$6368)           |
| Hospitalization ≥2 Months                         | n = 5                                | n = 13                                | n = 46                                  |
| Median (IQR) Total Costs                          | \$52,188 (IQR: \$49,374 to \$52,760) | \$66,341 (IQR: \$51,242 to \$106,412) | \$124,864 (IQR: \$86,564 to \$174,503)  |
| Median (IQR) Cost of Diagnosis                    | \$752 (IQR: \$592 to \$1192)         | \$871 (IQR: \$654 to \$1043)          | \$1083 (IQR: \$996 to \$1331)           |
| Median (IQR) Cost of Treatment                    | \$4176 (IQR: \$3835 to \$4621)       | \$4321 (IQR: \$2791 to \$4951)        | \$62,567 (IQR: \$31,925 to \$110,199)   |
| Median (IQR) Cost of Post-Treatment Monitoring    | \$115 (IQR: \$0 to \$115)            | \$157 (IQR: \$98 to \$191)            | \$203 (IQR: \$8 to \$349)               |
| Median (IQR) Cost of Hospitalization              | \$41,552 (IQR: \$41,480 to \$42,250) | \$54,106 (IQR: \$45,090 to \$75,918)  | \$49,603 (IQR: \$39,927 to \$62,368)    |
| Median (IQR) Cost for Public Health Interventions | \$4616 (IQR: \$3462 to \$5193)       | \$6183 (IQR: \$581 to \$6220)         | \$6611 (IQR: \$5429 to \$6876)          |
| Acid Fast Bacilli Smear Positive                  | n = 47                               | n = 35                                | n = 22                                  |
| Median (IQR) Total Costs                          | \$17,070 (IQR: \$12,487 to \$27,596) | \$27,164 (IQR: \$8286 to \$56,992)    | \$156,251 (IQR: \$91,590 to \$194,886)  |
| Median (IQR) Cost of Diagnosis                    | \$640 (IQR: \$510 to \$923)          | \$779 (IQR: \$671 to \$1038)          | \$1011 (IQR: \$817 to \$1148)           |
| Median (IQR) Cost of Treatment                    | \$2571 (IQR: \$1984 to \$3857)       | \$3203 (IQR: \$2362 to \$4208)        | \$103,076 (IQR: \$36,751 to \$130,946)  |
| Median (IQR) Cost of Post-Treatment Monitoring    | \$155 (IQR: \$111 to \$281)          | \$133 (IQR: \$73 to \$181)            | \$146 (IQR: \$39 to \$298)              |
| Median (IQR) Cost of Hospitalization              | \$6500 (IQR: \$0 to \$19,175)        | \$11,700 (IQR: \$0 to \$35,310)       | \$48,097 (IQR: \$39,626 to \$54,012)    |
| Median (IQR) Cost for Public Health Interventions | \$5210 (IQR: \$2885 to \$5765)       | \$5497 (IQR: \$2020 to \$6218)        | \$6428 (IQR: \$6144 to \$6877)          |
| Acid Fast Bacilli Smear Negative or Unknown       | n = 43                               | n = 36                                | n = 40                                  |
| Median (IQR) Total Costs                          | \$5292 (IQR: \$3099 to \$10,292)     | \$14,820 (IQR: \$5995 to \$24,698)    | \$113,952 (IQR: \$76,379 to \$144,753)  |
| Median (IQR) Cost of Diagnosis                    | \$729 (IQR: \$608 to \$1113)         | \$836 (IQR: \$646 to \$1073)          | \$1102 (IQR: \$958 to \$1365)           |
| Median (IQR) Cost of Treatment                    | \$1883 (IQR: \$1517 to \$2248)       | \$2816 (IQR: \$2079 to \$3669)        | \$56,285 (IQR: \$23,777 to \$98,875)    |
| Median (IQR) Cost of Post-Treatment Monitoring    | \$107 (IQR: \$0 to \$287)            | \$119 (IQR: \$0 to \$202)             | \$219 (IQR: \$46 to \$357)              |
| Median (IQR) Cost of Hospitalization              | \$0 (IQR: \$0 to \$3250)             | \$8775 (IQR: \$0 to \$15,987)         | \$39,275 (IQR: \$33,160 to \$57,370)    |
| Median (IQR) Cost for Public Health Interventions | \$1154 (IQR: \$353 to \$2885)        | \$1731 (IQR: \$577 to \$5739)         | \$6393 (IQR: \$1780 to \$6755)          |
| Cavities on Chest X-Ray                           | n = 30                               | n = 21                                | n = 15                                  |
| Median (IQR) Total Costs                          | \$16,574 (IQR: \$12,464 to \$27,138) | \$25,795 (IQR: \$7575 to \$66,341)    | \$165,586 (IQR: \$131,665 to \$209,581) |
| Median (IQR) Cost of Diagnosis                    | \$718 (IQR: \$557 to \$940)          | \$883 (IQR: \$739 to \$1119)          | \$1083 (IQR: \$944 to \$1275)           |
| Median (IQR) Cost of Treatment                    | \$2158 (IQR: \$1813 to \$3076)       | \$3203 (IQR: \$2496 to \$4407)        | \$107,991 (IQR: \$74,093 to \$127,872)  |
| Median (IQR) Cost of Post-Treatment Monitoring    | \$179 (IQR: \$109 to \$385)          | \$158 (IQR: \$114 to \$224)           | \$309 (IQR: \$79 to \$374)              |
| Median (IQR) Cost of Hospitalization              | \$7475 (IQR: \$0 to \$18,095)        | \$14,950 (IQR: \$0 to \$37,470)       | \$50,308 (IQR: \$39,913 to \$61,631)    |
| Median (IQR) Cost for Public Health Interventions | \$5219 (IQR: \$3606 to \$5767)       | \$5497 (IQR: \$1154 to \$6218)        | \$6456 (IQR: \$6370 to \$6817)          |
| No Cavities on Chest X-Ray or Unknown             | n = 60                               | n = 50                                | n = 47                                  |
| Median (IQR) Total Costs                          | \$7261 (IQR: \$3995 to \$19,379)     | \$17,412 (IQR: \$6879 to \$35,742)    | \$109,259 (IQR: \$75,325 to \$148,714)  |

| Group Comparison                                  | DS-TB                              | INHR-TB                            | MDR-TB                                 |
|---------------------------------------------------|------------------------------------|------------------------------------|----------------------------------------|
| Median (IQR) Cost of Diagnosis                    | \$701 (IQR: \$515 to \$1081)       | \$786 (IQR: \$628 to \$994)        | \$1083 (IQR: \$925 to \$1331)          |
| Median (IQR) Cost of Treatment                    | \$2071 (IQR: \$1571 to \$3178)     | \$2795 (IQR: \$2077 to \$3860)     | \$47,677 (IQR: \$23,440 to \$102,921)  |
| Median (IQR) Cost of Post-Treatment Monitoring    | \$115 (IQR: \$0 to \$230)          | \$107 (IQR: \$2 to \$185)          | \$189 (IQR: \$16 to \$318)             |
| Median (IQR) Cost of Hospitalization              | \$0 (IQR: \$0 to \$10,170)         | \$9750 (IQR: \$0 to \$17,020)      | \$39,876 (IQR: \$32,658 to \$53,912)   |
| Median (IQR) Cost for Public Health Interventions | \$1731 (IQR: \$577 to \$4920)      | \$2308 (IQR: \$1102 to \$6020)     | \$6380 (IQR: \$2071 to \$6791)         |
| Disease Has No Extrapulmonary Involvement         | n = 68                             | n = 51                             | n = 47                                 |
| Median (IQR) Total Costs                          | \$13,011 (IQR: \$6108 to \$23,655) | \$21,322 (IQR: \$7117 to \$43,510) | \$119,569 (IQR: \$84,556 to \$172,236) |
| Median (IQR) Cost of Diagnosis                    | \$709 (IQR: \$572 to \$981)        | \$828 (IQR: \$657 to \$1055)       | \$1102 (IQR: \$996 to \$1377)          |
| Median (IQR) Cost of Treatment                    | \$2127 (IQR: \$1615 to \$3188)     | \$3024 (IQR: \$2387 to \$3919)     | \$62,038 (IQR: \$26,708 to \$108,560)  |
| Median (IQR) Cost of Post-Treatment Monitoring    | \$137 (IQR: \$34 to \$287)         | \$132 (IQR: \$73 to \$206)         | \$222 (IQR: \$46 to \$348)             |
| Median (IQR) Cost of Hospitalization              | \$3575 (IQR: \$0 to \$15,036)      | \$10,400 (IQR: \$0 to \$31,528)    | \$45,290 (IQR: \$37,571 to \$61,118)   |
| Median (IQR) Cost for Public Health Interventions | \$4745 (IQR: \$1731 to \$5450)     | \$5489 (IQR: \$2020 to \$6218)     | \$6600 (IQR: \$6216 to \$6868)         |
| Disease Has Extrapulmonary Involvement            | n = 22                             | n = 20                             | n = 15                                 |
| Median (IQR) Total Costs                          | \$5578 (IQR: \$2988 to \$25,163)   | \$17,444 (IQR: \$7842 to \$27,039) | \$113,897 (IQR: \$78,192 to \$142,141) |
| Median (IQR) Cost of Diagnosis                    | \$685 (IQR: \$508 to \$1129)       | \$757 (IQR: \$666 to \$952)        | \$969 (IQR: \$856 to \$1077)           |
| Median (IQR) Cost of Treatment                    | \$2240 (IQR: \$1548 to \$3121)     | \$2362 (IQR: \$1971 to \$3918)     | \$60,790 (IQR: \$41,066 to \$110,603)  |
| Median (IQR) Cost of Post-Treatment Monitoring    | \$141 (IQR: \$0 to \$273)          | \$119 (IQR: \$0 to \$175)          | \$158 (IQR: \$31 to \$253)             |
| Median (IQR) Cost of Hospitalization              | \$0 (IQR: \$0 to \$20,962)         | \$10,400 (IQR: \$3088 to \$15,987) | \$35,412 (IQR: \$24,621 to \$41,781)   |
| Median (IQR) Cost for Public Health Interventions | \$577 (IQR: \$238 to \$1480)       | \$1141 (IQR: \$399 to \$1875)      | \$1486 (IQR: \$1139 to \$3812)         |

Abbreviations: IQR, interquartile range; DS-TB, drug-susceptible tuberculosis; INHR-TB, isoniazid-resistant tuberculosis; MDR-TB, multidrug-resistant tuberculosis

**Appendix Table 7.** Mean Costs for Each Form of Tuberculosis Stratified by Clinical Characteristics and Hospitalization

| Group Comparison                                | DS-TB    | INHR-TB  | MDR-TB    |
|-------------------------------------------------|----------|----------|-----------|
| No Hospitalization or Hospitalization <2 months | n = 85   | n = 58   | n = 16    |
| Mean Total Costs                                | \$13,741 | \$20,219 | \$98,227  |
| Mean Cost of Diagnosis                          | \$783    | \$854    | \$1,173   |
| Mean Cost of Treatment                          | \$2,504  | \$3,757  | \$68,994  |
| Mean Cost of Post-Treatment Monitoring          | \$186    | \$159    | \$249     |
| Mean Cost of Hospitalization                    | \$6,669  | \$8,712  | \$23,236  |
| Mean Cost for Public Health Interventions       | \$3,599  | \$6,736  | \$4,575   |
| Hospitalization ≥2 Months                       | n = 5    | n = 13   | n = 46    |
| Mean Total Costs                                | \$50,300 | \$86,437 | \$143,451 |
| Mean Cost of Diagnosis                          | \$895    | \$884    | \$1,253   |
| Mean Cost of Treatment                          | \$3,968  | \$8,588  | \$76,698  |
| Mean Cost of Post-Treatment Monitoring          | \$92     | \$196    | \$241     |
| Mean Cost of Hospitalization                    | \$41,186 | \$70,158 | \$57,679  |
| Mean Cost for Public Health Interventions       | \$4,160  | \$6,611  | \$7,580   |
| Acid Fast Bacilli Smear Positive                | n = 47   | n = 35   | n = 22    |
| Mean Total Costs                                | \$21,486 | \$41,946 | \$166,159 |
| Mean Cost of Diagnosis                          | \$747    | \$834    | \$1,087   |
| Mean Cost of Treatment                          | \$2,889  | \$4,393  | \$101,149 |
| Mean Cost of Post-Treatment Monitoring          | \$205    | \$181    | \$214     |
| Mean Cost of Hospitalization                    | \$12,397 | \$25,791 | \$54,209  |
| Mean Cost for Public Health Interventions       | \$5,249  | \$10,747 | \$9,500   |
| Acid Fast Bacilli Smear Negative or Unknown     | n = 43   | n = 36   | n = 40    |
| Mean Total Costs                                | \$9,527  | \$23,007 | \$112,872 |
| Mean Cost of Diagnosis                          | \$835    | \$885    | \$1,313   |
| Mean Cost of Treatment                          | \$2,254  | \$4,883  | \$60,168  |
| Mean Cost of Post-Treatment Monitoring          | \$154    | \$151    | \$259     |
| Mean Cost of Hospitalization                    | \$4,423  | \$14,297 | \$45,810  |
| Mean Cost for Public Health Interventions       | \$1,861  | \$2,791  | \$5,322   |
| Cavities on Chest X-Ray                         | n = 30   | n = 21   | n = 15    |
| Mean Total Costs                                | \$20,264 | \$45,617 | \$178,906 |
| Mean Cost of Diagnosis                          | \$773    | \$929    | \$1,255   |
| Mean Cost of Treatment                          | \$2,788  | \$3,407  | \$113,691 |
| Mean Cost of Post-Treatment Monitoring          | \$247    | \$192    | \$306     |
| Mean Cost of Hospitalization                    | \$11,107 | \$29,561 | \$52,340  |
| Mean Cost for Public Health Interventions       | \$5,349  | \$11,528 | \$11,315  |
| No Cavities on Chest X-Ray or Unknown           | n = 60   | n = 50   | n = 47    |
| Mean Total Costs                                | \$13,526 | \$26,768 | \$116,740 |
| Mean Cost of Diagnosis                          | \$798    | \$831    | \$1,226   |
| Mean Cost of Treatment                          | \$2,484  | \$5,160  | \$62,269  |
| Mean Cost of Post-Treatment Monitoring          | \$148    | \$155    | \$223     |
| Mean Cost of Hospitalization                    | \$7,327  | \$15,932 | \$47,658  |
| Mean Cost for Public Health Interventions       | \$2,771  | \$4,691  | \$5,365   |
| Disease Has No Extrapulmonary Involvement       | n = 68   | n = 51   | n = 47    |
| Mean Total Costs                                | \$16,293 | \$34,070 | \$137,823 |
| Mean Cost of Diagnosis                          | \$791    | \$864    | \$1,254   |
| Mean Cost of Treatment                          | \$2,597  | \$4,230  | \$75,683  |
| Mean Cost of Post-Treatment Monitoring          | \$183    | \$172    | \$253     |
| Mean Cost of Hospitalization                    | \$8,421  | \$20,747 | \$52,771  |
| Mean Cost for Public Health Interventions       | \$4,301  | \$8,057  | \$7,863   |
| Disease Has Extrapulmonary Involvement          | n = 22   | n = 20   | n = 15    |
| Mean Total Costs                                | \$14,161 | \$27,940 | \$112,846 |
| Mean Cost of Diagnosis                          | \$784    | \$849    | \$1,166   |
| Mean Cost of Treatment                          | \$2,549  | \$5,691  | \$71,660  |
| Mean Cost of Post-Treatment Monitoring          | \$175    | \$150    | \$213     |
| Mean Cost of Hospitalization                    | \$9,099  | \$17,965 | \$36,319  |
| Mean Cost for Public Health Interventions       | \$1,556  | \$3,286  | \$3,489   |

Abbreviations: DS-TB, drug-susceptible tuberculosis; INHR-TB, isoniazid-resistant tuberculosis; MDR-TB, multidrug-resistant tuberculosis

**Appendix Table 8.** Mean Costs of Different Forms of Tuberculosis

| Group                                                                   | Mean Total Cost | Mean Cost of Diagnosis | Mean Cost of Treatment | Mean Cost of Post-Treatment Monitoring | Mean Cost of Hospitalization | Mean Cost for Public Health Interventions |
|-------------------------------------------------------------------------|-----------------|------------------------|------------------------|----------------------------------------|------------------------------|-------------------------------------------|
| <b>TB Infection</b>                                                     |                 |                        |                        |                                        |                              |                                           |
| British Columbia Centre for Disease Control (n=30)                      | \$896           | \$342                  | \$549                  | \$5                                    | \$0                          | \$0                                       |
| West Park Healthcare Centre (n=30)                                      | \$1,207         | \$363                  | \$791                  | \$53                                   | \$0                          | \$0                                       |
| Montreal Chest Institute (n=30)                                         | \$647           | \$218                  | \$421                  | \$8                                    | \$0                          | \$0                                       |
| Isoniazid Only (n=49)                                                   | \$1,055         | \$349                  | \$678                  | \$28                                   | \$0                          | \$0                                       |
| Rifampin Only (n=35)                                                    | \$671           | \$236                  | \$422                  | \$13                                   | \$0                          | \$0                                       |
| Other Isoniazid-Containing Regimen (n=6)                                | \$1,215         | \$385                  | \$810                  | \$19                                   | \$0                          | \$0                                       |
| <b>DS-TB Disease</b>                                                    |                 |                        |                        |                                        |                              |                                           |
| British Columbia Centre for Disease Control (n=30)                      | \$20,893        | \$945                  | \$3,067                | \$162                                  | \$12,622                     | \$4,097                                   |
| West Park Healthcare Centre (n=30)                                      | \$15,591        | \$670                  | \$1,934                | \$169                                  | \$8,928                      | \$3,890                                   |
| Montreal Chest Institute (n=30)                                         | \$10,833        | \$753                  | \$2,754                | \$211                                  | \$4,211                      | \$2,903                                   |
| <b>INHR-TB Disease</b>                                                  |                 |                        |                        |                                        |                              |                                           |
| British Columbia Centre for Disease Control (n=30)                      | \$21,415        | \$912                  | \$2,657                | \$124                                  | \$11,327                     | \$6,393                                   |
| West Park Healthcare Centre (n=27)                                      | \$52,090        | \$820                  | \$7,698                | \$156                                  | \$38,338                     | \$5,077                                   |
| Montreal Chest Institute (n=14)                                         | \$17,679        | \$824                  | \$2,998                | \$274                                  | \$3,030                      | \$10,554                                  |
| <b>MDR-TB Disease</b>                                                   |                 |                        |                        |                                        |                              |                                           |
| British Columbia Centre for Disease Control (n=11)                      | \$187,836       | \$1,229                | \$132,798              | \$386                                  | \$42,056                     | \$11,365                                  |
| West Park Healthcare Centre (n=45)                                      | \$120,152       | \$1,298                | \$61,196               | \$188                                  | \$52,032                     | \$5,438                                   |
| Montreal Chest Institute (n=6)                                          | \$116,225       | \$752                  | \$69,569               | \$388                                  | \$36,827                     | \$8,690                                   |
| Susceptible to both Fluoroquinolones and Second-Line Injectables (n=50) | \$118,643       | \$1,237                | \$67,591               | \$233                                  | \$43,082                     | \$6,499                                   |
| Resistant to a Fluoroquinolone and/or Second-Line Injectable (n=12)     | \$186,520       | \$1,216                | \$104,371              | \$282                                  | \$72,576                     | \$8,075                                   |

Abbreviations: TB, tuberculosis; DS-TB, drug-susceptible tuberculosis; INHR-TB, isoniazid-resistant tuberculosis; MDR-TB, multidrug-resistant tuberculosis



**Appendix Table 9.** Univariable Analysis of Characteristics Associated with Increasing or Decreasing Costs, Reported as Cost Ratios and 95% Confidence Intervals

| Characteristic                        | All Patients<br>(n=313) | TB Infection<br>(n=90) | DS-TB<br>(n=90)      | INHR-TB<br>(n=71)   | MDR-TB<br>(n=62)    |
|---------------------------------------|-------------------------|------------------------|----------------------|---------------------|---------------------|
| TB Type                               |                         | --                     | --                   | --                  | --                  |
| DS-TB                                 | 1.0 (reference)         | --                     | --                   | --                  | --                  |
| TB Infection                          | 0.08 (0.06 to 0.1)      | --                     | --                   | --                  | --                  |
| INHR-TB                               | 1.64 (1.28 to 2.09)     | --                     | --                   | --                  | --                  |
| MDR-TB                                | 9.14 (7.04 to 11.88)    | --                     | --                   | --                  | --                  |
| Age                                   |                         |                        |                      |                     |                     |
| <40 years                             | 1.0 (reference)         | 1.0 (reference)        | 1.0 (reference)      | 1.0 (reference)     | 1.0 (reference)     |
| ≥40 years                             | 1.07 (0.69 to 1.68)     | 1.29 (1.09 to 1.53)    | 0.93 (0.59 to 1.46)  | 1.13 (0.73 to 1.76) | 0.81 (0.62 to 1.07) |
| Sex                                   |                         |                        |                      |                     |                     |
| Female                                | 1.0 (reference)         | 1.0 (reference)        | 1.0 (reference)      | 1.0 (reference)     | 1.0 (reference)     |
| Male                                  | 1.14 (0.75 to 1.73)     | 0.99 (0.83 to 1.17)    | 0.74 (0.49 to 1.11)  | 1.30 (0.85 to 2.00) | 0.88 (0.67 to 1.17) |
| HIV                                   |                         |                        |                      |                     |                     |
| HIV-Negative or unknown               | 1.0 (reference)         | --*                    | 1.0 (reference)      | --*                 | 1.0 (reference)     |
| HIV-Positive                          | 6.8 (0.55 to 84.13)     | --*                    | 5.74 (0.89 to 37.13) | --*                 | 0.66 (0.23 to 1.93) |
| Diabetes                              |                         |                        |                      |                     |                     |
| No Diabetes or unknown                | 1.0 (reference)         | 1.0 (reference)        | 1.0 (reference)      | 1.0 (reference)     | 1.0 (reference)     |
| Has Diabetes                          | 1.15 (0.64 to 2.05)     | 1.1 (0.85 to 1.42)     | 1.32 (0.874 to 2.32) | 1.63 (0.88 to 3.03) | 0.88 (0.61 to 1.27) |
| Adverse Events                        |                         |                        |                      |                     |                     |
| None                                  | 1.0 (reference)         | 1.0 (reference)        | 1.0 (reference)      | 1.0 (reference)     | 1.0 (reference)     |
| At Least One                          | 6.97 (4.83 to 10.04)    | 0.99 (0.72 to 1.35)    | 1.56 (1.05 to 2.32)  | 1.50 (0.96 to 2.34) | 1.11 (0.77 to 1.61) |
| Hospitalization                       |                         |                        |                      |                     |                     |
| None or <2 months                     | --                      | --                     | 1.0 (reference)      | 1.0 (reference)     | 1.0 (reference)     |
| ≥2 months                             | --                      | --                     | 4.74 (2.08 to 10.83) | 3.98 (2.42 to 6.54) | 1.75 (1.30 to 2.35) |
| Acid Fast Bacilli Smear               |                         |                        |                      |                     |                     |
| Negative or unknown                   | --                      | --                     | 1.0 (reference)      | 1.0 (reference)     | 1.0 (reference)     |
| Positive                              | --                      | --                     | 2.67 (1.87 to 3.82)  | 1.92 (1.28 to 2.89) | 1.29 (0.98 to 1.71) |
| Cavities on Chest X-Ray               |                         |                        |                      |                     |                     |
| None or unknown                       | --                      | --                     | 1.0 (reference)      | 1.0 (reference)     | 1.0 (reference)     |
| Yes                                   | --                      | --                     | 1.73 (1.15 to 2.61)  | 1.26 (0.78 to 2.02) | 1.53 (1.13 to 2.07) |
| TB Location                           |                         |                        |                      |                     |                     |
| Pulmonary Only                        | --                      | --                     | 1.0 (reference)      | 1.0 (reference)     | 1.0 (reference)     |
| Extrapulmonary Involvement            | --                      | --                     | 0.61 (0.39 to 0.96)  | 0.99 (0.6 to 1.62)  | 0.90 (0.66 to 1.24) |
| Number of Contacts                    |                         |                        |                      |                     |                     |
| Per Additional Contact                | --                      | --                     | 1.07 (1.04 to 1.11)  | 1.02 (1.01 to 1.02) | 1.01 (1.00 to 1.02) |
| Received DOT                          |                         |                        |                      |                     |                     |
| No                                    | --                      | --                     | 1.0 (reference)      | 1.0 (reference)     | 1.0 (reference)     |
| Yes                                   | --                      | --                     | 1.39 (0.59 to 3.28)  | 1.94 (0.97 to 3.88) | 0.62 (0.42 to 0.92) |
| TB Infection Regimen                  |                         |                        |                      |                     |                     |
| Mono-Rifampin                         | --                      | 1.0 (reference)        | --                   | --                  | --                  |
| Isoniazid Containing                  | --                      | 1.36 (1.05 to 1.77)    | --                   | --                  | --                  |
| MDR-TB Resistance Pattern             |                         |                        |                      |                     |                     |
| MDR-TB                                | --                      | --                     | --                   | --                  | 1.0 (reference)     |
| Fluoroquinolone and/or SLI Resistance | --                      | --                     | --                   | --                  | 1.54 (1.11 to 2.13) |

\*No one with HIV.

Abbreviations: TB, tuberculosis; DS-TB, drug susceptible tuberculosis; INHR-TB, isoniazid-resistant tuberculosis; MDR-TB, multidrug resistant tuberculosis; DOT, directly observed therapy; SLI, second-line injectable

**Appendix Table 10.** Multivariable Analysis of Characteristics Associated with Increasing or Decreasing Costs Among All Patients (TB Infection Excluded), Reported as Cost Ratios and 95% Confidence Intervals

| Characteristic             | Univariable Analysis<br>(n=223) | Multivariable Analysis<br>(n=223) |
|----------------------------|---------------------------------|-----------------------------------|
| TB Type                    |                                 |                                   |
| DS-TB                      | 1.0 (reference)                 | 1.0 (reference)                   |
| INHR-TB                    | 1.63 (1.24 to 2.16)             | 1.33 (1.05 to 1.68)               |
| MDR-TB                     | 9.17 (6.77 to 12.42)            | 3.64 (2.61 to 5.08)               |
| Age                        |                                 |                                   |
| <40 years                  | 1.0 (reference)                 | 1.0 (reference)                   |
| ≥40 years                  | 0.72 (0.51 to 1.01)             | 0.94 (0.76 to 1.16)               |
| Sex                        |                                 |                                   |
| Female                     | 1.0 (reference)                 | 1.0 (reference)                   |
| Male                       | 0.78 (0.56 to 1.09)             | 0.79 (0.65 to 0.97)               |
| HIV                        |                                 |                                   |
| HIV-Negative or unknown    | 1.0 (reference)                 | --                                |
| HIV-Positive               | 2.64 (0.47 to 14.8)             | --                                |
| Diabetes                   |                                 |                                   |
| No Diabetes or unknown     | 1.0 (reference)                 | --                                |
| Has Diabetes               | 1.11 (0.7 to 1.75)              | --                                |
| Adverse Events             |                                 |                                   |
| None                       | 1.0 (reference)                 | 1.0 (reference)                   |
| At Least One               | 2.48 (1.82 to 3.4)              | 1.35 (1.08 to 1.68)               |
| Hospitalization            |                                 |                                   |
| None or <2 months          | 1.0 (reference)                 | 1.0 (reference)                   |
| ≥2 months                  | 6.71 (4.98 to 9.05)             | 2.61 (1.96 to 3.47)               |
| Acid Fast Bacilli Smear    |                                 |                                   |
| Negative or unknown        | 1.0 (reference)                 | --                                |
| Positive                   | 1.36 (0.97 to 1.89)             | --                                |
| Cavities on Chest X-Ray    |                                 |                                   |
| None or unknown            | 1.0 (reference)                 | 1.0 (reference)                   |
| Yes                        | 1.29 (0.9 to 1.84)              | 1.3 (1.03 to 1.63)                |
| TB Location                |                                 |                                   |
| Pulmonary Only             | 1.0 (reference)                 | 1.0 (reference)                   |
| Extrapulmonary Involvement | 0.77 (0.53 to 1.11)             | 0.96 (0.75 to 1.22)               |
| Number of Contacts         |                                 |                                   |
| Per Additional Contact     | 1.02 (1.01 to 1.03)             | 1.02 (1.01 to 1.02)               |
| Received DOT               |                                 |                                   |
| No                         | 1.0 (reference)                 | 1.0 (reference)                   |
| Yes                        | 3.94 (2.27 to 6.85)             | 1.91 (1.34 to 2.74)               |

Abbreviations: TB, tuberculosis; DS-TB, drug susceptible tuberculosis; INHR-TB, isoniazid-resistant tuberculosis; MDR-TB, multidrug resistant tuberculosis; DOT, directly observed therapy

**Appendix Table 11.** Multivariable Analysis of Characteristics Associated with Increasing or Decreasing Costs, Excluding People Who Did Not Complete Treatment, Reported as Cost Ratios and 95% Confidence Intervals

| Characteristic                        | All Patients<br>(n=272) | TB Infection<br>(n=77) | DS-TB<br>(n=83)       | INHR-TB<br>(n=63)   | MDR-TB<br>(n=49)    |
|---------------------------------------|-------------------------|------------------------|-----------------------|---------------------|---------------------|
| TB Type                               |                         | --                     | --                    | --                  | --                  |
| DS-TB                                 | 1.0 (reference)         | --                     | --                    | --                  | --                  |
| TB Infection                          | 0.11 (0.08 to 0.13)     | --                     | --                    | --                  | --                  |
| INHR-TB                               | 1.8 (1.4 to 2.31)       | --                     | --                    | --                  | --                  |
| MDR-TB                                | 8.06 (6.02 to 10.81)    | --                     | --                    | --                  | --                  |
| Age                                   |                         |                        |                       |                     |                     |
| <40 years                             | 1.0 (reference)         | 1.0 (reference)        | 1.0 (reference)       | 1.0 (reference)     | 1.0 (reference)     |
| ≥40 years                             | 0.95 (0.78 to 1.15)     | 1.20 (1.04 to 1.39)    | 0.82 (0.55 to 1.2)    | 1.11 (0.82 to 1.52) | 0.93 (0.7 to 1.24)  |
| Sex                                   |                         |                        |                       |                     |                     |
| Female                                | 1.0 (reference)         | 1.0 (reference)        | 1.0 (reference)       | 1.0 (reference)     | 1.0 (reference)     |
| Male                                  | 0.97 (0.81 to 1.16)     | 1.0 (0.87 to 1.16)     | 0.83 (0.59 to 1.17)   | 1.05 (0.77 to 1.42) | 1.0 (0.74 to 1.36)  |
| HIV                                   |                         |                        |                       |                     |                     |
| HIV-Negative or unknown               | 1.0 (reference)         | --*                    | 1.0 (reference)       | --*                 | --*                 |
| HIV-Positive                          | 6.71 (1.5 to 29.95)     | --*                    | 12.76 (2.99 to 54.41) | --*                 | --*                 |
| Diabetes                              |                         |                        |                       |                     |                     |
| No Diabetes or unknown                | 1.0 (reference)         | 1.0 (reference)        | 1.0 (reference)       | 1.0 (reference)     | 1.0 (reference)     |
| Has Diabetes                          | --†                     | --†                    | --†                   | 1.31 (0.83 to 2.07) | --†                 |
| Adverse Events                        |                         |                        |                       |                     |                     |
| None                                  | 1.0 (reference)         | 1.0 (reference)        | 1.0 (reference)       | 1.0 (reference)     | 1.0 (reference)     |
| At Least One                          | 1.57 (1.26 to 1.97)     | --†                    | 1.62 (1.14 to 2.3)    | 1.23 (0.89 to 1.69) | --†                 |
| Hospitalization                       |                         |                        |                       |                     |                     |
| None or <2 months                     | --                      | --                     | 1.0 (reference)       | 1.0 (reference)     | 1.0 (reference)     |
| ≥2 months                             | --                      | --                     | 3.64 (1.84 to 7.18)   | 3.4 (2.29 to 5.06)  | 1.43 (1.01 to 2.03) |
| Acid Fast Bacilli Smear               |                         |                        |                       |                     |                     |
| Negative or unknown                   | --                      | --                     | 1.0 (reference)       | 1.0 (reference)     | 1.0 (reference)     |
| Positive                              | --                      | --                     | 1.52 (1.01 to 2.32)   | 1.34 (0.96 to 1.85) | 1.01 (0.73 to 1.41) |
| Cavities on Chest X-Ray               |                         |                        |                       |                     |                     |
| None or unknown                       | --                      | --                     | 1.0 (reference)       | 1.0 (reference)     | 1.0 (reference)     |
| Yes                                   | --                      | --                     | 1.25 (0.84 to 1.84)   | 0.85 (0.6 to 1.19)  | 1.29 (0.9 to 1.84)  |
| TB Location                           |                         |                        |                       |                     |                     |
| Pulmonary Only                        | --                      | --                     | 1.0 (reference)       | 1.0 (reference)     | 1.0 (reference)     |
| Extrapulmonary Involvement            | --                      | --                     | 0.7 (0.47 to 1.04)    | --†                 | --†                 |
| Number of Contacts                    |                         |                        |                       |                     |                     |
| Per Additional Contact                | --                      | --                     | 1.05 (1.02 to 1.08)   | 1.02 (1.01 to 1.02) | 1.01 (1.01 to 1.02) |
| Received DOT                          |                         |                        |                       |                     |                     |
| No                                    | --                      | --                     | 1.0 (reference)       | 1.0 (reference)     | 1.0 (reference)     |
| Yes                                   | --                      | --                     | --†                   | 1.81 (1.1 to 2.98)  | 0.88 (0.51 to 1.5)  |
| TB Infection Regimen                  |                         |                        |                       |                     |                     |
| Mono-Rifampin                         | --                      | 1.0 (reference)        | --                    | --                  | --                  |
| Isoniazid Containing                  | --                      | 1.26 (0.98 to 1.61)    | --                    | --                  | --                  |
| MDR-TB Resistance Pattern             |                         |                        |                       |                     |                     |
| MDR-TB                                | --                      | --                     | --                    | --                  | 1.0 (reference)     |
| Fluoroquinolone and/or SLI Resistance | --                      | --                     | --                    | --                  | 1.37 (0.93 to 2.01) |

\*No one with HIV.

†Not retained in multivariable model

Abbreviations: TB, tuberculosis; DS-TB, drug susceptible tuberculosis; INHR-TB, isoniazid-resistant tuberculosis; MDR-TB, multidrug resistant tuberculosis; DOT, directly observed therapy; SLI, second-line injectable

**Appendix Table 12.** TB Infection Patient Characteristics and Costs Stratified by TB Treatment Centre

| Characteristic                                 | British Columbia Centre for Disease Control | West Park Healthcare Centre (Ontario) | Montreal Chest Institute (Quebec) |
|------------------------------------------------|---------------------------------------------|---------------------------------------|-----------------------------------|
| Number of Patients                             | 30                                          | 30                                    | 30                                |
| Regimen                                        |                                             |                                       |                                   |
| Isoniazid Only                                 | 25 (83%)                                    | 23 (77%)                              | 1 (3%)                            |
| Rifampin Only                                  | 4 (13%)                                     | 2 (7%)                                | 29 (97%)                          |
| Isoniazid and Rifampin                         | 0 (0%)                                      | 2 (7%)                                | 0 (0%)                            |
| Started Isoniazid but Switched to Rifampin     | 1 (3%)                                      | 3 (10%)                               | 0 (0%)                            |
| Demographic Characteristics                    |                                             |                                       |                                   |
| Median (IQR) Age, years                        | 53 (IQR: 36 to 65)                          | 32 (IQR: 28 to 41)                    | 32 (IQR: 24 to 42)                |
| Male Sex                                       | 16 (53%)                                    | 6 (20%)                               | 13 (43%)                          |
| Female Sex                                     | 14 (47%)                                    | 24 (80%)                              | 17 (57%)                          |
| Born Outside Canada                            | 25 (83%)                                    | 26 (87%)                              | 28 (93%)                          |
| Clinical Characteristics                       |                                             |                                       |                                   |
| HIV-Positive                                   | 0 (0%)                                      | 0 (0%)                                | 0 (0%)                            |
| HIV-Negative                                   | 4 (13%)                                     | 29 (97%)                              | 0 (0%)                            |
| Unknown HIV Status                             | 26 (87%)                                    | 1 (3%)                                | 30 (100%)                         |
| Has Diabetes                                   | 10 (33%)                                    | 2 (7%)                                | 0 (0%)                            |
| No Diabetes                                    | 17 (57%)                                    | 27 (90%)                              | 30 (100%)                         |
| Unknown Diabetes                               | 3 (10%)                                     | 1 (3%)                                | 0 (0%)                            |
| Current Smoker                                 | 0 (0%)                                      | 5 (17%)                               | 2 (7%)                            |
| Ex-Smoker                                      | 2 (7%)                                      | 4 (13%)                               | 1 (3%)                            |
| Never Smoker                                   | 19 (63%)                                    | 21 (70%)                              | 26 (87%)                          |
| Smoking Unknown                                | 9 (30%)                                     | 0 (0%)                                | 1 (3%)                            |
| Currently Drinks $\geq 3$ drinks per day       | 0 (0%)                                      | 1 (3%)                                | 0 (0%)                            |
| Currently Drinks $< 3$ drinks per day          | 23 (77%)                                    | 27 (90%)                              | 29 (97%)                          |
| Drinking Habits Unknown                        | 7 (23%)                                     | 2 (7%)                                | 1 (3%)                            |
| Uses Illicit Drugs                             | 0 (0%)                                      | 0 (0%)                                | 0 (0%)                            |
| Does not Use Illicit Drugs                     | 21 (70%)                                    | 29 (97%)                              | 28 (93%)                          |
| Illicit Drug Use Unknown                       | 9 (30%)                                     | 1 (3%)                                | 2 (7%)                            |
| Treatment Information                          |                                             |                                       |                                   |
| Median (IQR) Treatment Duration, months        | 9 (IQR: 8.6 to 9.2)                         | 8.7 (IQR: 4 to 9)                     | 4 (IQR: 4 to 4.2)                 |
| Cure or Treatment Complete                     | 30 (100%)                                   | 21 (70%)                              | 26 (87%)                          |
| Incomplete Treatment due to Adverse Event      | 0 (0%)                                      | 4 (13%)                               | 0 (0%)                            |
| Incomplete Treatment due to Failure            | 0 (0%)                                      | 0 (0%)                                | 0 (0%)                            |
| Lost to Follow-up                              | 0 (0%)                                      | 5 (17%)                               | 4 (13%)                           |
| Died during Treatment                          | 0 (0%)                                      | 0 (0%)                                | 0 (0%)                            |
| Cost Information                               |                                             |                                       |                                   |
| Median (IQR) Total Costs                       | \$798 (IQR: \$682 to \$984)                 | \$1189 (IQR: \$1033 to \$1505)        | \$587 (IQR: \$520 to \$667)       |
| Median (IQR) Cost of Diagnosis                 | \$252 (IQR: \$217 to \$414)                 | \$337 (IQR: \$337 to \$399)           | \$194 (IQR: \$194 to \$217)       |
| Median (IQR) Cost of Treatment                 | \$530 (IQR: \$394 to \$691)                 | \$778 (IQR: \$558 to \$1085)          | \$391 (IQR: \$311 to \$473)       |
| Median (IQR) Cost of Post-Treatment Monitoring | \$0 (IQR: \$0 to \$0)                       | \$18 (IQR: \$0 to \$93)               | \$0 (IQR: \$0 to \$0)             |
| Median (IQR) Cost of Hospitalization           | \$0 (IQR: \$0 to \$0)                       | \$0 (IQR: \$0 to \$0)                 | \$0 (IQR: \$0 to \$0)             |

Abbreviations: IQR, interquartile range

**Appendix Table 13.** TB Infection Patient Characteristics and Costs Stratified by Regimen Received

| Characteristic                                 | Isoniazid Only               | Rifampin Only               | Other Isoniazid-Containing Regimen |
|------------------------------------------------|------------------------------|-----------------------------|------------------------------------|
| Number of Patients                             | 49                           | 35                          | 6*                                 |
| TB Treatment Centre                            |                              |                             |                                    |
| Montreal Chest Institute (Quebec)              | 1 (2%)                       | 29 (83%)                    | 0 (0%)                             |
| Ontario                                        | 23 (47%)                     | 2 (6%)                      | 5 (83%)                            |
| British Columbia Centre for Disease Control    | 25 (51%)                     | 4 (11%)                     | 1 (17%)                            |
| Demographic Characteristics                    |                              |                             |                                    |
| Median (IQR) Age, years                        | 42 (IQR: 31 to 59)           | 32 (IQR: 26 to 42)          | 36 (IQR: 34 to 39)                 |
| Male Sex                                       | 18 (37%)                     | 15 (43%)                    | 2 (33%)                            |
| Female Sex                                     | 31 (63%)                     | 20 (57%)                    | 4 (67%)                            |
| Born Outside Canada                            | 41 (84%)                     | 33 (94%)                    | 5 (83%)                            |
| Clinical Characteristics                       |                              |                             |                                    |
| HIV-Positive                                   | 0 (0%)                       | 0 (0%)                      | 0 (0%)                             |
| HIV-Negative                                   | 27 (55%)                     | 1 (3%)                      | 5 (83%)                            |
| Unknown HIV Status                             | 22 (45%)                     | 34 (97%)                    | 1 (17%)                            |
| Has Diabetes                                   | 9 (18%)                      | 3 (9%)                      | 0 (0%)                             |
| No Diabetes                                    | 36 (73%)                     | 32 (91%)                    | 6 (100%)                           |
| Unknown Diabetes                               | 4 (8%)                       | 0 (0%)                      | 0 (0%)                             |
| Current Smoker                                 | 5 (10%)                      | 2 (6%)                      | 0 (0%)                             |
| Ex-Smoker                                      | 5 (10%)                      | 2 (6%)                      | 0 (0%)                             |
| Never Smoker                                   | 31 (63%)                     | 29 (83%)                    | 6 (100%)                           |
| Smoking Unknown                                | 8 (16%)                      | 2 (6%)                      | 0 (0%)                             |
| Currently Drinks ≥3 drinks per day             | 1 (2%)                       | 0 (0%)                      | 0 (0%)                             |
| Currently Drinks <3 drinks per day             | 41 (84%)                     | 33 (94%)                    | 5 (83%)                            |
| Drinking Habits Unknown                        | 7 (14%)                      | 2 (6%)                      | 1 (17%)                            |
| Uses Illicit Drugs                             | 0 (0%)                       | 0 (0%)                      | 0 (0%)                             |
| Does not Use Illicit Drugs                     | 41 (84%)                     | 32 (91%)                    | 5 (83%)                            |
| Illicit Drug Use Unknown                       | 8 (16%)                      | 3 (9%)                      | 1 (17%)                            |
| Treatment Information                          |                              |                             |                                    |
| Median (IQR) Treatment Duration, months        | 9 (IQR: 8.7 to 9.2)          | 4 (IQR: 3.9 to 4.2)         | 4.9 (IQR: 4.1 to 5.9)              |
| Cure or Treatment Complete                     | 42 (86%)                     | 30 (86%)                    | 5 (83%)                            |
| Incomplete Treatment due to Adverse Event      | 3 (6%)                       | 0 (0%)                      | 1 (17%)                            |
| Incomplete Treatment due to Failure            | 0 (0%)                       | 0 (0%)                      | 0 (0%)                             |
| Lost to Follow-up                              | 4 (8%)                       | 5 (14%)                     | 0 (0%)                             |
| Died during Treatment                          | 0 (0%)                       | 0 (0%)                      | 0 (0%)                             |
| Cost Information                               |                              |                             |                                    |
| Median (IQR) Total Costs                       | \$985 (IQR: \$726 to \$1378) | \$587 (IQR: \$524 to \$699) | \$1165 (IQR: \$1065 to \$1242)     |
| Median (IQR) Cost of Diagnosis                 | \$337 (IQR: \$217 to \$414)  | \$194 (IQR: \$194 to \$221) | \$379 (IQR: \$329 to \$424)        |
| Median (IQR) Cost of Treatment                 | \$600 (IQR: \$427 to \$900)  | \$392 (IQR: \$304 to \$478) | \$743 (IQR: \$709 to \$782)        |
| Median (IQR) Cost of Post-Treatment Monitoring | \$0 (IQR: \$0 to \$18)       | \$0 (IQR: \$0 to \$0)       | \$9 (IQR: \$0 to \$18)             |
| Median (IQR) Cost of Hospitalization           | \$0 (IQR: \$0 to \$0)        | \$0 (IQR: \$0 to \$0)       | \$0 (IQR: \$0 to \$0)              |

Abbreviations: IQR, interquartile range

\*Two patients initiating isoniazid and rifampin regimen, four patients initiating isoniazid and experiencing an adverse event and receiving rifampin.

**Appendix Table 14.** Drug-Susceptible TB Disease Patient Characteristics and Costs Stratified by TB Treatment Centre

| Characteristic                                                                  | British Columbia Centre for Disease Control | West Park Healthcare Centre (Ontario) | Montreal Chest Institute (Quebec) |
|---------------------------------------------------------------------------------|---------------------------------------------|---------------------------------------|-----------------------------------|
| Number of Patients                                                              | 30                                          | 30                                    | 30                                |
| Demographic Characteristics                                                     |                                             |                                       |                                   |
| Median (IQR) Age, years                                                         | 56 (IQR: 39 to 78)                          | 50 (IQR: 38 to 76)                    | 30 (IQR: 27 to 37)                |
| Male Sex                                                                        | 12 (40%)                                    | 19 (63%)                              | 9 (30%)                           |
| Female Sex                                                                      | 18 (60%)                                    | 11 (37%)                              | 21 (70%)                          |
| Born Outside Canada                                                             | 26 (87%)                                    | 27 (90%)                              | 27 (90%)                          |
| Clinical Characteristics                                                        |                                             |                                       |                                   |
| HIV-Positive                                                                    | 0 (0%)                                      | 0 (0%)                                | 1 (3%)                            |
| HIV-Negative                                                                    | 24 (80%)                                    | 23 (77%)                              | 22 (73%)                          |
| Unknown HIV Status                                                              | 6 (20%)                                     | 7 (23%)                               | 7 (23%)                           |
| Has Diabetes                                                                    | 3 (10%)                                     | 8 (27%)                               | 2 (7%)                            |
| No Diabetes                                                                     | 25 (83%)                                    | 22 (73%)                              | 28 (93%)                          |
| Unknown Diabetes                                                                | 2 (7%)                                      | 0 (0%)                                | 0 (0%)                            |
| Current Smoker                                                                  | 5 (17%)                                     | 7 (23%)                               | 2 (7%)                            |
| Ex-Smoker                                                                       | 1 (3%)                                      | 4 (13%)                               | 0 (0%)                            |
| Never Smoker                                                                    | 21 (70%)                                    | 19 (63%)                              | 28 (93%)                          |
| Smoking Unknown                                                                 | 3 (10%)                                     | 0 (0%)                                | 0 (0%)                            |
| Currently Drinks ≥3 drinks per day                                              | 1 (3%)                                      | 0 (0%)                                | 0 (0%)                            |
| Currently Drinks <3 drinks per day                                              | 24 (80%)                                    | 28 (93%)                              | 30 (100%)                         |
| Drinking Habits Unknown                                                         | 5 (17%)                                     | 2 (7%)                                | 0 (0%)                            |
| Uses Illicit Drugs                                                              | 0 (0%)                                      | 1 (3%)                                | 0 (0%)                            |
| Does not Use Illicit Drugs                                                      | 26 (87%)                                    | 27 (90%)                              | 30 (100%)                         |
| Illicit Drug Use Unknown                                                        | 4 (13%)                                     | 2 (7%)                                | 0 (0%)                            |
| Disease Characteristics                                                         |                                             |                                       |                                   |
| Acid Fast Bacilli Smear Positive                                                | 19 (63%)                                    | 21 (70%)                              | 7 (23%)                           |
| Acid Fast Bacilli Smear Negative                                                | 11 (37%)                                    | 9 (30%)                               | 23 (77%)                          |
| Acid Fast Bacilli Smear Unknown                                                 | 0 (0%)                                      | 0 (0%)                                | 0 (0%)                            |
| Cavities on Chest X-Ray                                                         | 11 (37%)                                    | 12 (40%)                              | 7 (23%)                           |
| No Cavities on Chest X-Ray                                                      | 18 (60%)                                    | 18 (60%)                              | 23 (77%)                          |
| Unknown Cavities                                                                | 1 (3%)                                      | 0 (0%)                                | 0 (0%)                            |
| Exclusively Pulmonary Disease                                                   | 22 (73%)                                    | 21 (70%)                              | 25 (83%)                          |
| Disease with Extrapulmonary Involvement                                         | 8 (27%)                                     | 9 (30%)                               | 5 (17%)                           |
| Treatment Information                                                           |                                             |                                       |                                   |
| Hospitalized                                                                    | 15 (50%)                                    | 23 (77%)                              | 8 (27%)                           |
| Median (IQR) Duration of Hospitalization, days                                  | 37 (IQR: 26 to 61)                          | 13 (IQR: 8 to 27)                     | 24 (IQR: 14 to 28)                |
| Median (IQR) Drugs Stopped for Adverse Event                                    | 0 (IQR: 0 to 4)                             | 1 (IQR: 0 to 1)                       | 0 (IQR: 0 to 1)                   |
| Received a TB Drug Other than Isoniazid, Rifampin, Ethambutol, and Pyrazinamide | 10 (33%)                                    | 4 (13%)                               | 7 (23%)                           |
| Median (IQR) Treatment Duration, months                                         | 8.9 (IQR: 6.2 to 9.7)                       | 9.1 (IQR: 7.6 to 10)                  | 6.4 (IQR: 6.1 to 9)               |
| Cure or Treatment Complete                                                      | 26 (87%)                                    | 27 (90%)                              | 30 (100%)                         |
| Incomplete Treatment due to Adverse Event                                       | 0 (0%)                                      | 0 (0%)                                | 0 (0%)                            |
| Incomplete Treatment due to Failure                                             | 0 (0%)                                      | 0 (0%)                                | 0 (0%)                            |
| Lost to Follow-up                                                               | 2 (7%)                                      | 3 (10%)                               | 0 (0%)                            |
| Died during Treatment                                                           | 2 (7%)                                      | 0 (0%)                                | 0 (0%)                            |
| Cost Information                                                                |                                             |                                       |                                   |
| Median (IQR) Total Costs                                                        | \$15,201 (IQR: \$6975 to \$33,983)          | \$13,328 (IQR: \$7921 to \$19,080)    | \$4987 (IQR: \$3572 to \$16,196)  |
| Median (IQR) Cost of Diagnosis                                                  | \$962 (IQR: \$671 to \$1165)                | \$653 (IQR: \$506 to \$742)           | \$615 (IQR: \$454 to \$987)       |
| Median (IQR) Cost of Treatment                                                  | \$2642 (IQR: \$1996 to \$4138)              | \$1951 (IQR: \$1444 to \$2158)        | \$2071 (IQR: \$1708 to \$3319)    |
| Median (IQR) Cost of Post-Treatment Monitoring                                  | \$115 (IQR: \$0 to \$230)                   | \$141 (IQR: \$67 to \$252)            | \$107 (IQR: \$28 to \$435)        |
| Median (IQR) Cost of Hospitalization                                            | \$975 (IQR: \$0 to \$23,888)                | \$5850 (IQR: \$3250 to \$11,212)      | \$0 (IQR: \$0 to \$3423)          |
| Median (IQR) Cost for Public Health Interventions                               | \$3174 (IQR: \$1731 to \$5626)              | \$5213 (IQR: \$705 to \$5353)         | \$1154 (IQR: \$238 to \$3462)     |

Abbreviations: IQR, interquartile range

**Appendix Table 15.** Isoniazid-Resistant TB Disease Patient Characteristics and Costs Stratified by TB Treatment Centre

| Characteristic                                       | British Columbia Centre for<br>Disease Control | West Park Healthcare<br>Centre<br>(Ontario) | Montreal Chest<br>Institute<br>(Quebec) |
|------------------------------------------------------|------------------------------------------------|---------------------------------------------|-----------------------------------------|
| Number of Patients                                   | 30                                             | 27                                          | 14                                      |
| Demographic Characteristics                          |                                                |                                             |                                         |
| Median (IQR) Age, years                              | 52 (IQR: 34 to 69)                             | 41 (IQR: 30 to 57)                          | 39 (IQR: 31 to 54)                      |
| Male Sex                                             | 14 (47%)                                       | 12 (44%)                                    | 7 (50%)                                 |
| Female Sex                                           | 16 (53%)                                       | 15 (56%)                                    | 7 (50%)                                 |
| Born Outside Canada                                  | 27 (90%)                                       | 25 (93%)                                    | 10 (71%)                                |
| Clinical Characteristics                             |                                                |                                             |                                         |
| HIV-Positive                                         | 0 (0%)                                         | 0 (0%)                                      | 0 (0%)                                  |
| HIV-Negative                                         | 0 (0%)                                         | 0 (0%)                                      | 12 (86%)                                |
| Unknown HIV Status                                   | 30 (100%)                                      | 27 (100%)                                   | 2 (14%)                                 |
| Has Diabetes                                         | 6 (20%)                                        | 3 (11%)                                     | 1 (7%)                                  |
| No Diabetes                                          | 24 (80%)                                       | 24 (89%)                                    | 12 (86%)                                |
| Unknown Diabetes                                     | 0 (0%)                                         | 0 (0%)                                      | 1 (7%)                                  |
| Current Smoker                                       | 4 (13%)                                        | 5 (19%)                                     | 2 (14%)                                 |
| Ex-Smoker                                            | 2 (7%)                                         | 5 (19%)                                     | 2 (14%)                                 |
| Never Smoker                                         | 22 (73%)                                       | 15 (56%)                                    | 9 (64%)                                 |
| Smoking Unknown                                      | 2 (7%)                                         | 2 (7%)                                      | 1 (7%)                                  |
| Currently Drinks ≥3 drinks per day                   | 3 (10%)                                        | 3 (11%)                                     | 0 (0%)                                  |
| Currently Drinks <3 drinks per day                   | 23 (77%)                                       | 22 (81%)                                    | 12 (86%)                                |
| Drinking Habits Unknown                              | 4 (13%)                                        | 2 (7%)                                      | 2 (14%)                                 |
| Uses Illicit Drugs                                   | 0 (0%)                                         | 0 (0%)                                      | 0 (0%)                                  |
| Does not Use Illicit Drugs                           | 25 (83%)                                       | 26 (96%)                                    | 13 (93%)                                |
| Illicit Drug Use Unknown                             | 5 (17%)                                        | 1 (4%)                                      | 1 (7%)                                  |
| Disease Characteristics                              |                                                |                                             |                                         |
| Acid Fast Bacilli Smear Positive                     | 9 (30%)                                        | 9 (33%)                                     | 3 (21%)                                 |
| Acid Fast Bacilli Smear Negative                     | 21 (70%)                                       | 18 (67%)                                    | 6 (43%)                                 |
| Acid Fast Bacilli Smear Unknown                      | 0 (0%)                                         | 0 (0%)                                      | 5 (36%)                                 |
| Cavities on Chest X-Ray                              | 16 (53%)                                       | 12 (44%)                                    | 7 (50%)                                 |
| No Cavities on Chest X-Ray                           | 14 (47%)                                       | 15 (56%)                                    | 7 (50%)                                 |
| Unknown Cavities                                     | 0 (0%)                                         | 0 (0%)                                      | 0 (0%)                                  |
| Exclusively Pulmonary Disease                        | 18 (60%)                                       | 22 (81%)                                    | 11 (79%)                                |
| Disease with Extrapulmonary<br>Involvement           | 12 (40%)                                       | 5 (19%)                                     | 3 (21%)                                 |
| Treatment Information                                |                                                |                                             |                                         |
| Hospitalized                                         | 17 (57%)                                       | 25 (93%)                                    | 5 (36%)                                 |
| Median (IQR) Duration of<br>Hospitalization, days    | 19 (IQR: 13 to 51)                             | 54 (IQR: 20 to 76)                          | 7 (IQR: 5 to 20)                        |
| Median (IQR) Drugs Stopped for<br>Adverse Event      | 0 (IQR: 0 to 1)                                | 0 (IQR: 0 to 1)                             | 0 (IQR: 0 to 0)                         |
| Received a Fluoroquinolone                           | 21 (70%)                                       | 27 (100%)                                   | 6 (43%)                                 |
| Received a Second-Line Injectable                    | 0 (0%)                                         | 8 (30%)                                     | 0 (0%)                                  |
| Median (IQR) Treatment Duration,<br>months           | 11.5 (IQR: 9.3 to 12.4)                        | 17.6 (IQR: 12.3 to 18.8)                    | 8 (IQR: 6.1 to 9.4)                     |
| Cure or Treatment Complete                           | 24 (80%)                                       | 25 (93%)                                    | 14 (100%)                               |
| Incomplete Treatment due to Adverse<br>Event         | 0 (0%)                                         | 0 (0%)                                      | 0 (0%)                                  |
| Incomplete Treatment due to Failure                  | 2 (7%)                                         | 0 (0%)                                      | 0 (0%)                                  |
| Lost to Follow-up                                    | 2 (7%)                                         | 2 (7%)                                      | 0 (0%)                                  |
| Died during Treatment                                | 2 (7%)                                         | 0 (0%)                                      | 0 (0%)                                  |
| Cost Information                                     |                                                |                                             |                                         |
| Median (IQR) Total Costs                             | \$12,506 (IQR: \$5652 to \$26,443)             | \$34,400 (IQR: \$22,391 to<br>\$63,222)     | \$6504 (IQR: \$5156 to<br>\$9761)       |
| Median (IQR) Cost of Diagnosis                       | \$858 (IQR: \$674 to \$1144)                   | \$785 (IQR: \$637 to \$1002)                | \$806 (IQR: \$651 to<br>\$883)          |
| Median (IQR) Cost of Treatment                       | \$2407 (IQR: \$1871 to \$3226)                 | \$3835 (IQR: \$2464 to<br>\$6943)           | \$2831 (IQR: \$2391 to<br>\$3582)       |
| Median (IQR) Cost of Post-Treatment<br>Monitoring    | \$132 (IQR: \$0 to \$163)                      | \$127 (IQR: \$60 to \$195)                  | \$122 (IQR: \$107 to<br>\$563)          |
| Median (IQR) Cost of Hospitalization                 | \$3250 (IQR: \$0 to \$13,812)                  | \$23,400 (IQR: \$12,025 to<br>\$43,875)     | \$0 (IQR: \$0 to \$2969)                |
| Median (IQR) Cost for Public Health<br>Interventions | \$2020 (IQR: \$578 to \$5049)                  | \$6115 (IQR: \$5493 to<br>\$6218)           | \$1442 (IQR: \$24 to<br>\$2885)         |

Abbreviations: IQR, interquartile range

**Appendix Table 16.** Multidrug-Resistant TB Disease Patient Characteristics and Costs Stratified by TB Treatment Centre

| Characteristic                                         | West Park Healthcare                        |                                        |                                         |
|--------------------------------------------------------|---------------------------------------------|----------------------------------------|-----------------------------------------|
|                                                        | British Columbia Centre for Disease Control | Centre (Ontario)                       | Montreal Chest Institute (Quebec)       |
| Number of Patients                                     | 11                                          | 45                                     | 6                                       |
| Demographic Characteristics                            |                                             |                                        |                                         |
| Median (IQR) Age, years                                | 41 (IQR: 31 to 46)                          | 31 (IQR: 27 to 46)                     | 39 (IQR: 34 to 49)                      |
| Male Sex                                               | 4 (36%)                                     | 24 (53%)                               | 0 (0%)                                  |
| Female Sex                                             | 7 (64%)                                     | 21 (47%)                               | 6 (100%)                                |
| Born Outside Canada                                    | 10 (91%)                                    | 41 (91%)                               | 6 (100%)                                |
| Clinical Characteristics                               |                                             |                                        |                                         |
| HIV-Positive                                           | 0 (0%)                                      | 1 (2%)                                 | 0 (0%)                                  |
| HIV-Negative                                           | 10 (91%)                                    | 44 (98%)                               | 5 (83%)                                 |
| Unknown HIV Status                                     | 1 (9%)                                      | 0 (0%)                                 | 1 (17%)                                 |
| Has Diabetes                                           | 1 (9%)                                      | 8 (18%)                                | 1 (17%)                                 |
| No Diabetes                                            | 10 (91%)                                    | 37 (82%)                               | 5 (83%)                                 |
| Unknown Diabetes                                       | 0 (0%)                                      | 0 (0%)                                 | 0 (0%)                                  |
| Current Smoker                                         | 5 (45%)                                     | 10 (22%)                               | 0 (0%)                                  |
| Ex-Smoker                                              | 0 (0%)                                      | 9 (20%)                                | 0 (0%)                                  |
| Never Smoker                                           | 6 (55%)                                     | 26 (58%)                               | 6 (100%)                                |
| Smoking Unknown                                        | 0 (0%)                                      | 0 (0%)                                 | 0 (0%)                                  |
| Currently Drinks ≥3 drinks per day                     | 3 (27%)                                     | 17 (38%)                               | 0 (0%)                                  |
| Currently Drinks <3 drinks per day                     | 8 (73%)                                     | 27 (60%)                               | 6 (100%)                                |
| Drinking Habits Unknown                                | 0 (0%)                                      | 1 (2%)                                 | 0 (0%)                                  |
| Uses Illicit Drugs                                     | 0 (0%)                                      | 1 (2%)                                 | 0 (0%)                                  |
| Does not Use Illicit Drugs                             | 11 (100%)                                   | 44 (98%)                               | 6 (100%)                                |
| Illicit Drug Use Unknown                               | 0 (0%)                                      | 0 (0%)                                 | 0 (0%)                                  |
| Disease Characteristics                                |                                             |                                        |                                         |
| Acid Fast Bacilli Smear Positive                       | 5 (45%)                                     | 9 (20%)                                | 1 (17%)                                 |
| Acid Fast Bacilli Smear Negative                       | 6 (55%)                                     | 36 (80%)                               | 5 (83%)                                 |
| Acid Fast Bacilli Smear Unknown                        | 0 (0%)                                      | 0 (0%)                                 | 0 (0%)                                  |
| Cavities on Chest X-Ray                                | 7 (64%)                                     | 14 (31%)                               | 1 (17%)                                 |
| No Cavities on Chest X-Ray                             | 4 (36%)                                     | 31 (69%)                               | 5 (83%)                                 |
| Unknown Cavities                                       | 0 (0%)                                      | 0 (0%)                                 | 0 (0%)                                  |
| Exclusively Pulmonary Disease                          | 9 (82%)                                     | 35 (78%)                               | 3 (50%)                                 |
| Disease with Extrapulmonary Involvement                | 2 (18%)                                     | 10 (22%)                               | 3 (50%)                                 |
| Resistant to Fluoroquinolone or Second-Line Injectable | 1 (9%)                                      | 10 (22%)                               | 1 (17%)                                 |
| Treatment Information                                  |                                             |                                        |                                         |
| Hospitalized                                           | 10 (91%)                                    | 45 (100%)                              | 5 (83%)                                 |
| Median (IQR) Duration of Hospitalization, days         | 72 (IQR: 55 to 136)                         | 106 (IQR: 85 to 166)                   | 49 (IQR: 34 to 94)                      |
| Median (IQR) Drugs Stopped for Adverse Event           | 2 (IQR: 2 to 2)                             | 2 (IQR: 1 to 3)                        | 1 (IQR: 1 to 2)                         |
| Received Bedaquiline                                   | 1 (9%)                                      | 2 (4%)                                 | 0 (0%)                                  |
| Received Linezolid                                     | 5 (45%)                                     | 24 (53%)                               | 5 (83%)                                 |
| Received Delamanid                                     | 2 (18%)                                     | 0 (0%)                                 | 2 (33%)                                 |
| Median (IQR) Treatment Duration, months                | 20.8 (IQR: 20.1 to 21.6)                    | 22.7 (IQR: 20.1 to 25.8)               | 19.2 (IQR: 18.3 to 20)                  |
| Cure or Treatment Complete                             | 9 (82%)                                     | 35 (78%)                               | 5 (83%)                                 |
| Incomplete Treatment due to AE                         | 1 (9%)                                      | 0 (0%)                                 | 0 (0%)                                  |
| Incomplete Treatment due to Failure                    | 0 (0%)                                      | 0 (0%)                                 | 0 (0%)                                  |
| Lost to Follow-up                                      | 1 (9%)                                      | 8 (18%)                                | 1 (17%)                                 |
| Died during Treatment                                  | 0 (0%)                                      | 2 (4%)                                 | 0 (0%)                                  |
| Cost Information                                       |                                             |                                        |                                         |
| Median (IQR) Total Costs                               | \$153,086 (IQR: \$144,553 to \$232,607)     | \$107,955 (IQR: \$78,951 to \$148,983) | \$116,751 (IQR: \$113,925 to \$136,444) |
| Median (IQR) Cost of Diagnosis                         | \$892 (IQR: \$740 to \$1218)                | \$1102 (IQR: \$1007 to \$1343)         | \$742 (IQR: \$677 to \$795)             |
| Median (IQR) Cost of Treatment                         | \$134,021 (IQR: \$83,946 to \$162,725)      | \$41,513 (IQR: \$29,301 to \$100,296)  | \$79,240 (IQR: \$32,554 to \$106,371)   |
| Median (IQR) Cost of Post-Treatment Monitoring         | \$300 (IQR: \$164 to \$519)                 | \$158 (IQR: \$0 to \$286)              | \$398 (IQR: \$340 to \$472)             |
| Median (IQR) Cost of Hospitalization                   | \$40,952 (IQR: \$26,977 to \$51,778)        | \$42,082 (IQR: \$37,270 to \$56,318)   | \$30,302 (IQR: \$17,247 to \$61,265)    |
| Median (IQR) Cost for Public Health Interventions      | \$4616 (IQR: \$1485 to \$7338)              | \$6418 (IQR: \$5096 to \$6773)         | \$7058 (IQR: \$5842 to \$11,431)        |

Abbreviations: IQR, interquartile range; AE, adverse event



**Appendix Table 17. Multidrug-Resistant TB Disease Patient Characteristics and Costs Stratified by Resistance Pattern**

| Characteristic                                    | Susceptible to both Fluoroquinolones and Second-Line Injectables | Resistant to a Fluoroquinolone and/or Second-Line Injectable |
|---------------------------------------------------|------------------------------------------------------------------|--------------------------------------------------------------|
| Number of Patients                                | 50                                                               | 12                                                           |
| Demographic Characteristics                       |                                                                  |                                                              |
| Median (IQR) Age, years                           | 34 (IQR: 27 to 48)                                               | 31 (IQR: 28 to 43)                                           |
| Male Sex                                          | 27 (54%)                                                         | 1 (8%)                                                       |
| Female Sex                                        | 23 (46%)                                                         | 11 (92%)                                                     |
| Born Outside Canada                               | 46 (92%)                                                         | 11 (92%)                                                     |
| Clinical Characteristics                          |                                                                  |                                                              |
| HIV-Positive                                      | 1 (2%)                                                           | 0 (0%)                                                       |
| HIV-Negative                                      | 47 (94%)                                                         | 12 (100%)                                                    |
| Unknown HIV Status                                | 2 (4%)                                                           | 0 (0%)                                                       |
| Has Diabetes                                      | 10 (20%)                                                         | 0 (0%)                                                       |
| No Diabetes                                       | 40 (80%)                                                         | 12 (100%)                                                    |
| Unknown Diabetes                                  | 0 (0%)                                                           | 0 (0%)                                                       |
| Current Smoker                                    | 11 (22%)                                                         | 4 (33%)                                                      |
| Ex-Smoker                                         | 7 (14%)                                                          | 2 (17%)                                                      |
| Never Smoker                                      | 32 (64%)                                                         | 6 (50%)                                                      |
| Smoking Unknown                                   | 0 (0%)                                                           | 0 (0%)                                                       |
| Currently Drinks ≥3 drinks per day                | 14 (28%)                                                         | 6 (50%)                                                      |
| Currently Drinks <3 drinks per day                | 35 (70%)                                                         | 6 (50%)                                                      |
| Drinking Habits Unknown                           | 1 (2%)                                                           | 0 (0%)                                                       |
| Uses Illicit Drugs                                | 1 (2%)                                                           | 0 (0%)                                                       |
| Does not Use Illicit Drugs                        | 49 (98%)                                                         | 12 (100%)                                                    |
| Illicit Drug Use Unknown                          | 0 (0%)                                                           | 0 (0%)                                                       |
| Disease Characteristics                           |                                                                  |                                                              |
| Acid Fast Bacilli Smear Positive                  | 12 (24%)                                                         | 3 (25%)                                                      |
| Acid Fast Bacilli Smear Negative                  | 38 (76%)                                                         | 9 (75%)                                                      |
| Acid Fast Bacilli Smear Unknown                   | 0 (0%)                                                           | 0 (0%)                                                       |
| Cavities on Chest X-Ray                           | 17 (34%)                                                         | 5 (42%)                                                      |
| No Cavities on Chest X-Ray                        | 33 (66%)                                                         | 7 (58%)                                                      |
| Unknown Cavities                                  | 0 (0%)                                                           | 0 (0%)                                                       |
| Exclusively Pulmonary Disease                     | 38 (76%)                                                         | 9 (75%)                                                      |
| Disease with Extrapulmonary Involvement           | 12 (24%)                                                         | 3 (25%)                                                      |
| Treatment Information                             |                                                                  |                                                              |
| Hospitalized                                      | 48 (96%)                                                         | 12 (100%)                                                    |
| Median (IQR) Duration of Hospitalization, days    | 95 (IQR: 62 to 145)                                              | 152 (IQR: 96 to 170)                                         |
| Median (IQR) Drugs Stopped for Adverse Event      | 2 (IQR: 1 to 2)                                                  | 2 (IQR: 1 to 3)                                              |
| Received Bedaquiline                              | 1 (2%)                                                           | 2 (17%)                                                      |
| Received Linezolid                                | 25 (50%)                                                         | 9 (75%)                                                      |
| Received Delamanid                                | 3 (6%)                                                           | 1 (8%)                                                       |
| Median (IQR) Treatment Duration, months           | 20.9 (IQR: 20 to 24.2)                                           | 24.5 (IQR: 19.8 to 27)                                       |
| Cure or Treatment Complete                        | 39 (78%)                                                         | 10 (83%)                                                     |
| Incomplete Treatment due to Adverse Event         | 1 (2%)                                                           | 0 (0%)                                                       |
| Incomplete Treatment due to Failure               | 0 (0%)                                                           | 0 (0%)                                                       |
| Lost to Follow-up                                 | 8 (16%)                                                          | 2 (17%)                                                      |
| Died during Treatment                             | 2 (4%)                                                           | 0 (0%)                                                       |
| Cost Information                                  |                                                                  |                                                              |
| Median (IQR) Total Costs                          | \$113,952 (IQR: \$77,813 to \$150,573)                           | \$150,150 (IQR: \$101,802 to \$205,764)                      |
| Median (IQR) Cost of Diagnosis                    | \$1083 (IQR: \$910 to \$1313)                                    | \$1108 (IQR: \$989 to \$1386)                                |
| Median (IQR) Cost of Treatment                    | \$61,414 (IQR: \$25,411 to \$108,289)                            | \$80,710 (IQR: \$44,435 to \$128,231)                        |
| Median (IQR) Cost of Post-Treatment Monitoring    | \$189 (IQR: \$0 to \$341)                                        | \$219 (IQR: \$118 to \$338)                                  |
| Median (IQR) Cost of Hospitalization              | \$40,815 (IQR: \$34,322 to \$52,995)                             | \$61,195 (IQR: \$39,576 to \$104,532)                        |
| Median (IQR) Cost for Public Health Interventions | \$6383 (IQR: \$4657 to \$6767)                                   | \$6696 (IQR: \$5176 to \$6880)                               |

Abbreviations: IQR, interquartile range
